# Supplementary material for: One-pot synthesis of pyrazolo[4,3-d]thiazole derivatives containing α-aminophosphonate as potential Mur A inhibitors against MDR pathogens with radiosterilization and molecular modeling simulation
Source: Royal Society of Chemistry journal article supplement (doi:10.1039/d3ra07040a), 2023-01-01
Supplement: d3ra07040a1.pdf [file d3ra07040a1.pdf]

**One-pot synthesis of pyrazolo[4,3-*d*]thiazole derivatives containing  $\alpha$ -aminophosphonate as potential Mur A inhibitors against MDR pathogens with radiosterilization and molecular modeling simulation**

Ahmed Ragab <sup>a,\*</sup>, Seham A. Ibrahim <sup>b,\*</sup>, Dina S. Aboul-Magd <sup>c,\*</sup>, Mohamed H. Baren <sup>b</sup>

<sup>a</sup> Chemistry Department, Faculty of Science (Boys), Al-Azhar University, Nasr City, Cairo 11884, Egypt

<sup>b</sup> Chemistry Department, Faculty of Science, Tanta University, Tanta 31527, Egypt

<sup>c</sup> Drug Radiation Research Department, National Center for Radiation Research and Technology (NCRRT), Egyptian Atomic Energy Authority, Egypt

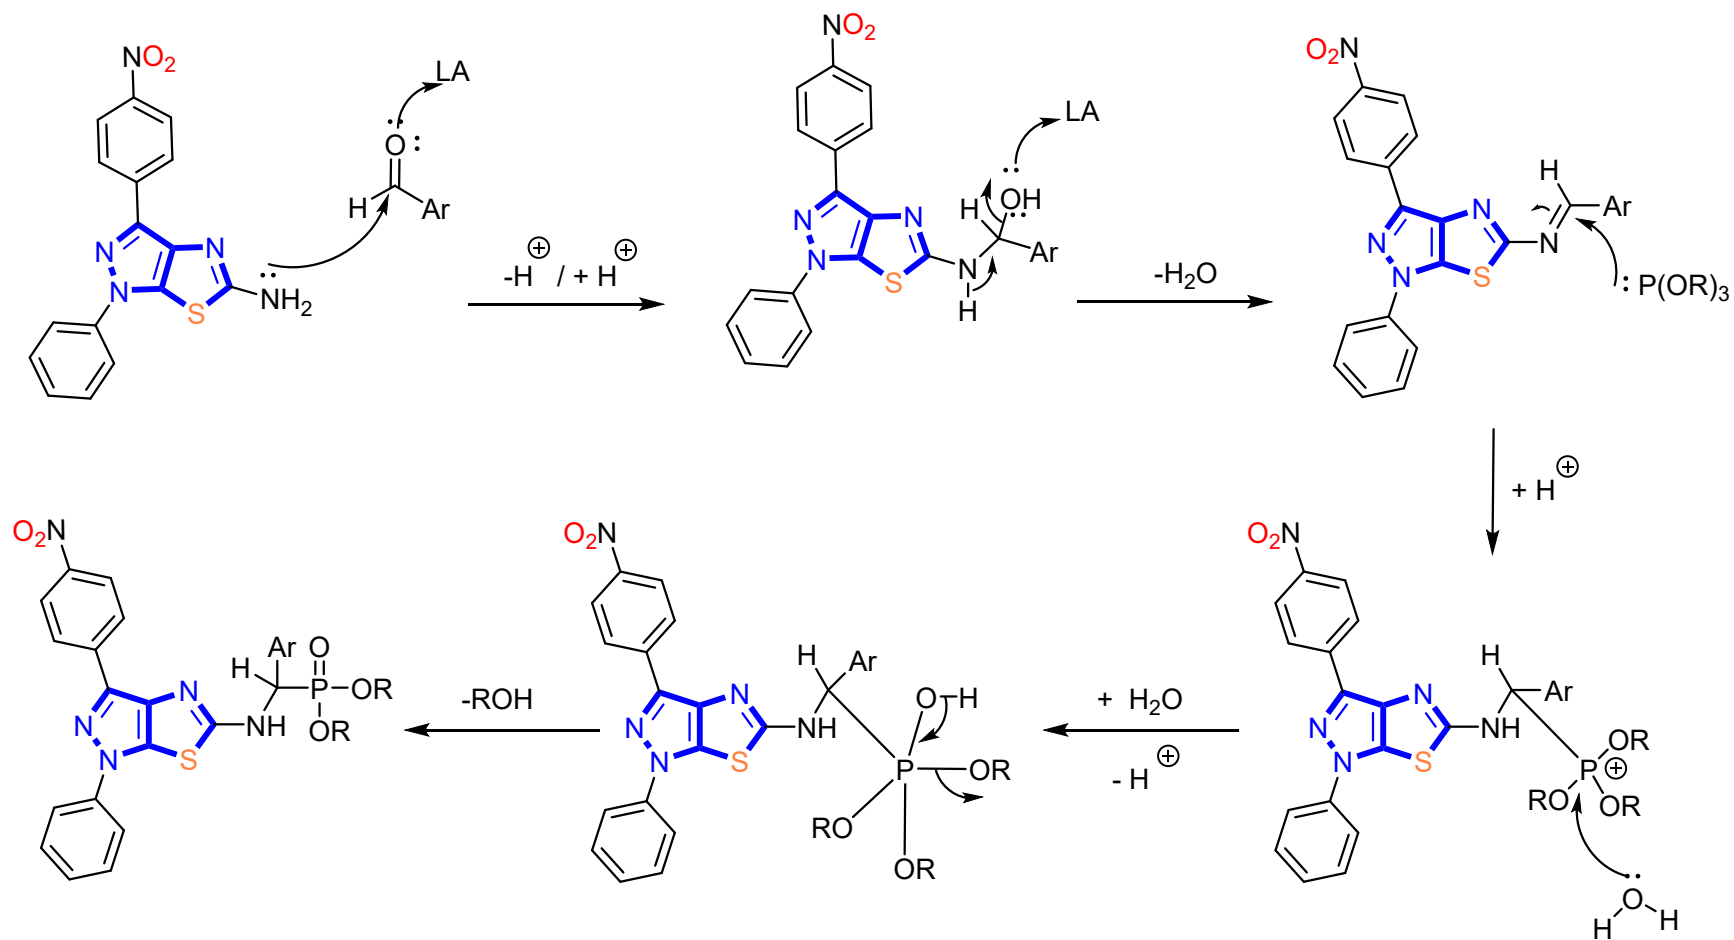

**Scheme S1:** Mechanistic pathway for synthesizing  $\alpha$ -aminophosphonates using  $\text{LiClO}_4$  as a catalyst

MS-1 HNMR

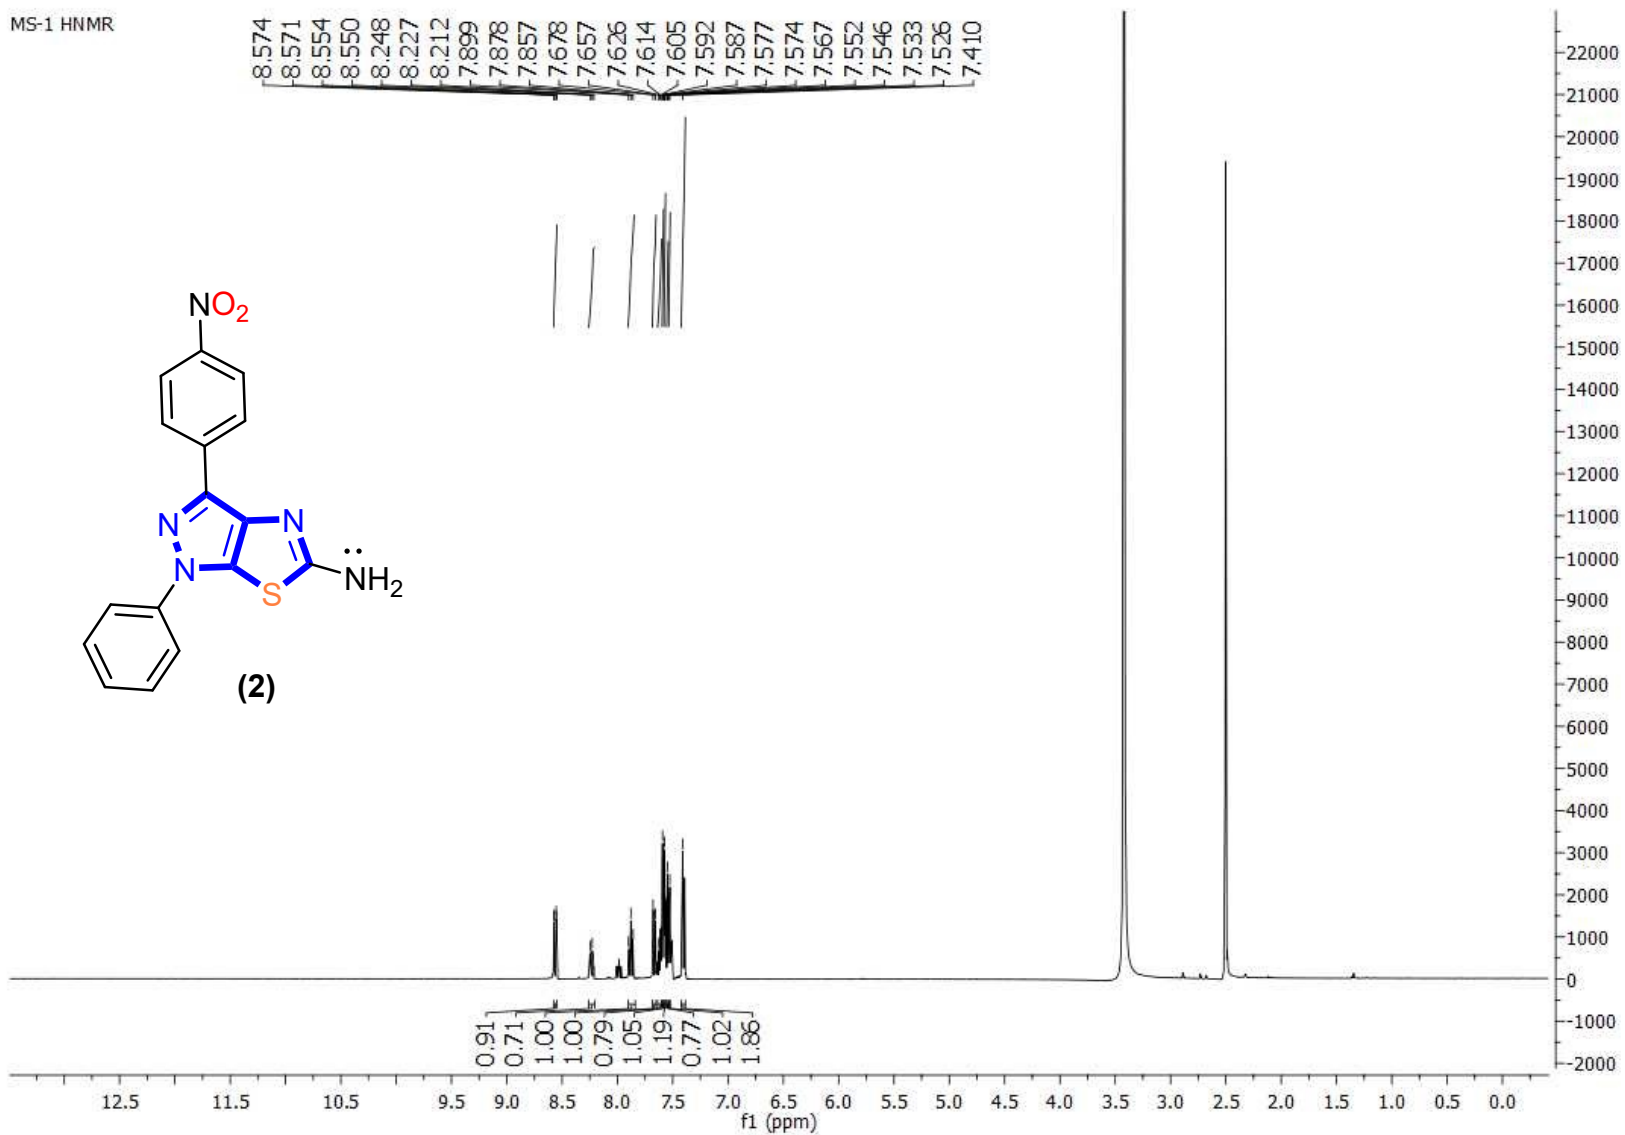

SEHAMYOSRY4-4-M1-DMSO+TFAA 13C

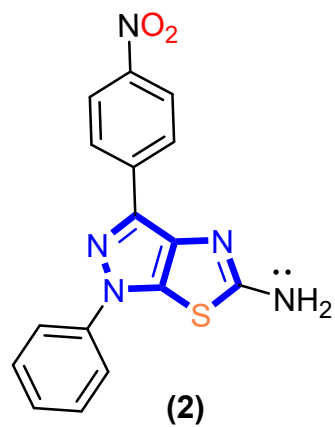

158.28  
143.01  
140.73  
135.82  
130.97  
130.24  
129.48  
127.42  
117.26  
116.38

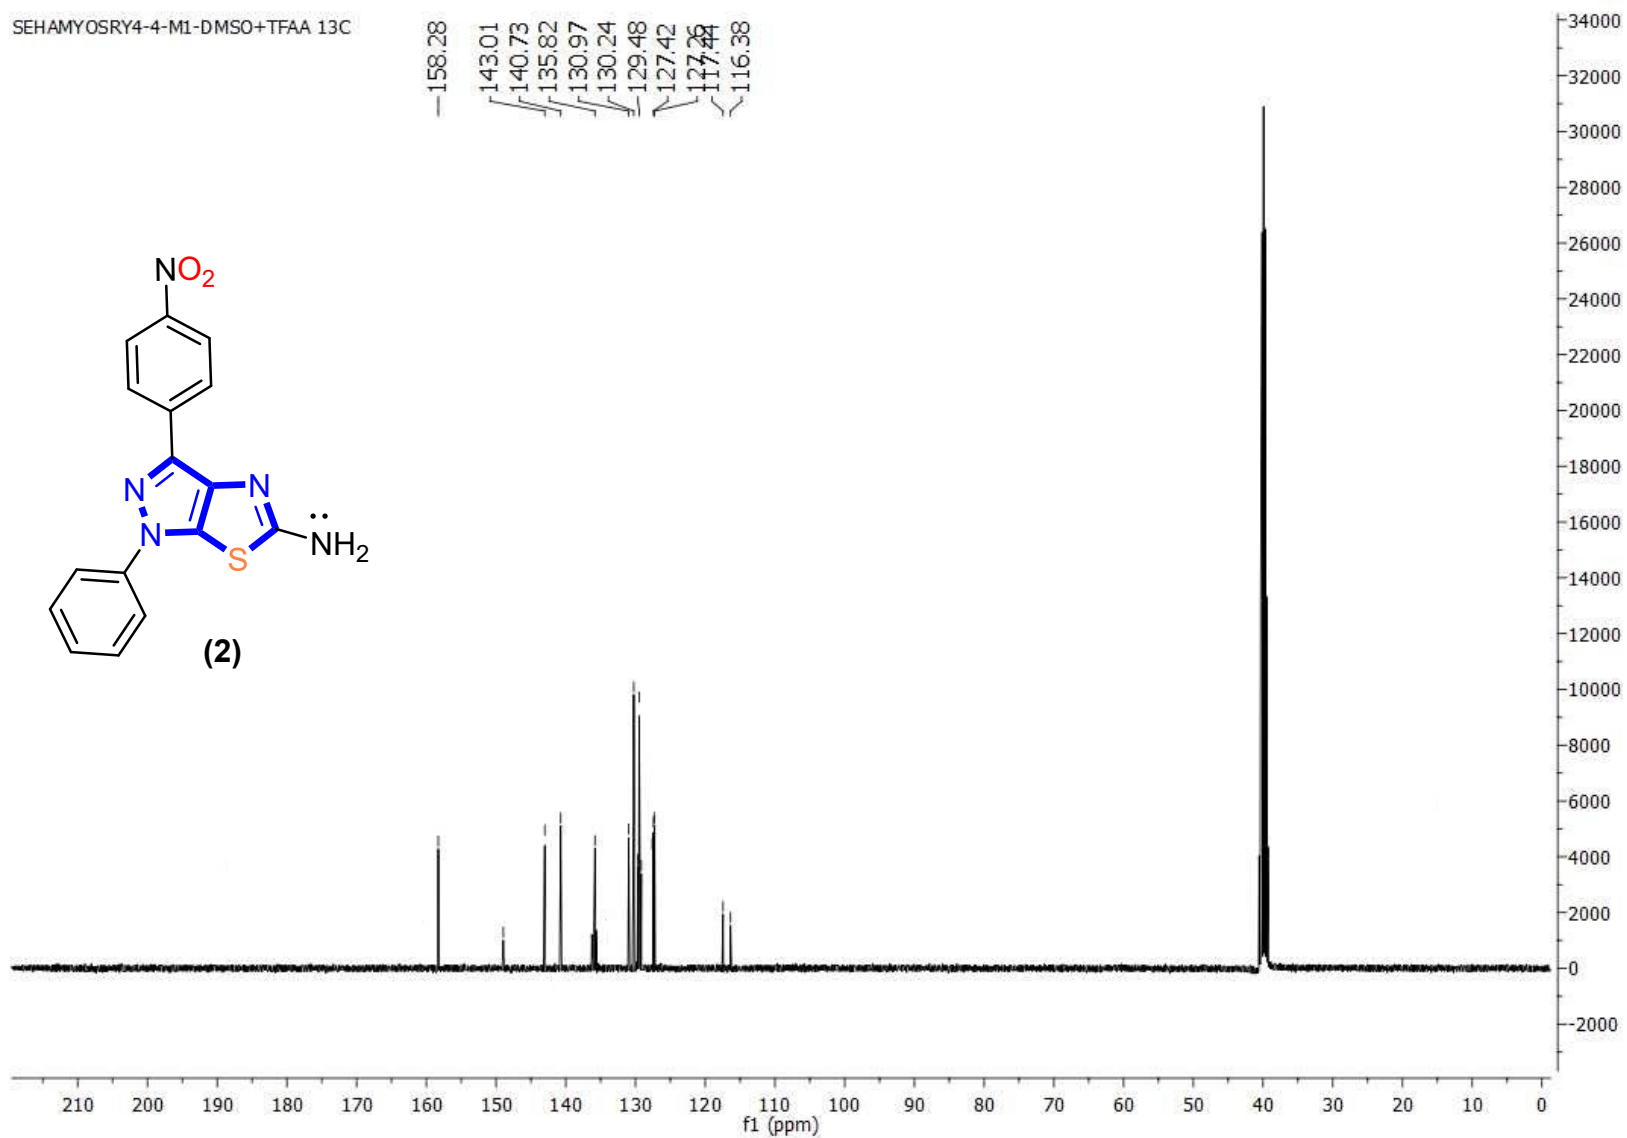

SEHAMYOSRY/31-3/A111-DMSO-d<sub>6</sub>-FAA-1H  
SEHAMYOSRY/31-3/A111-DMSO-d<sub>6</sub>-FAA-1H

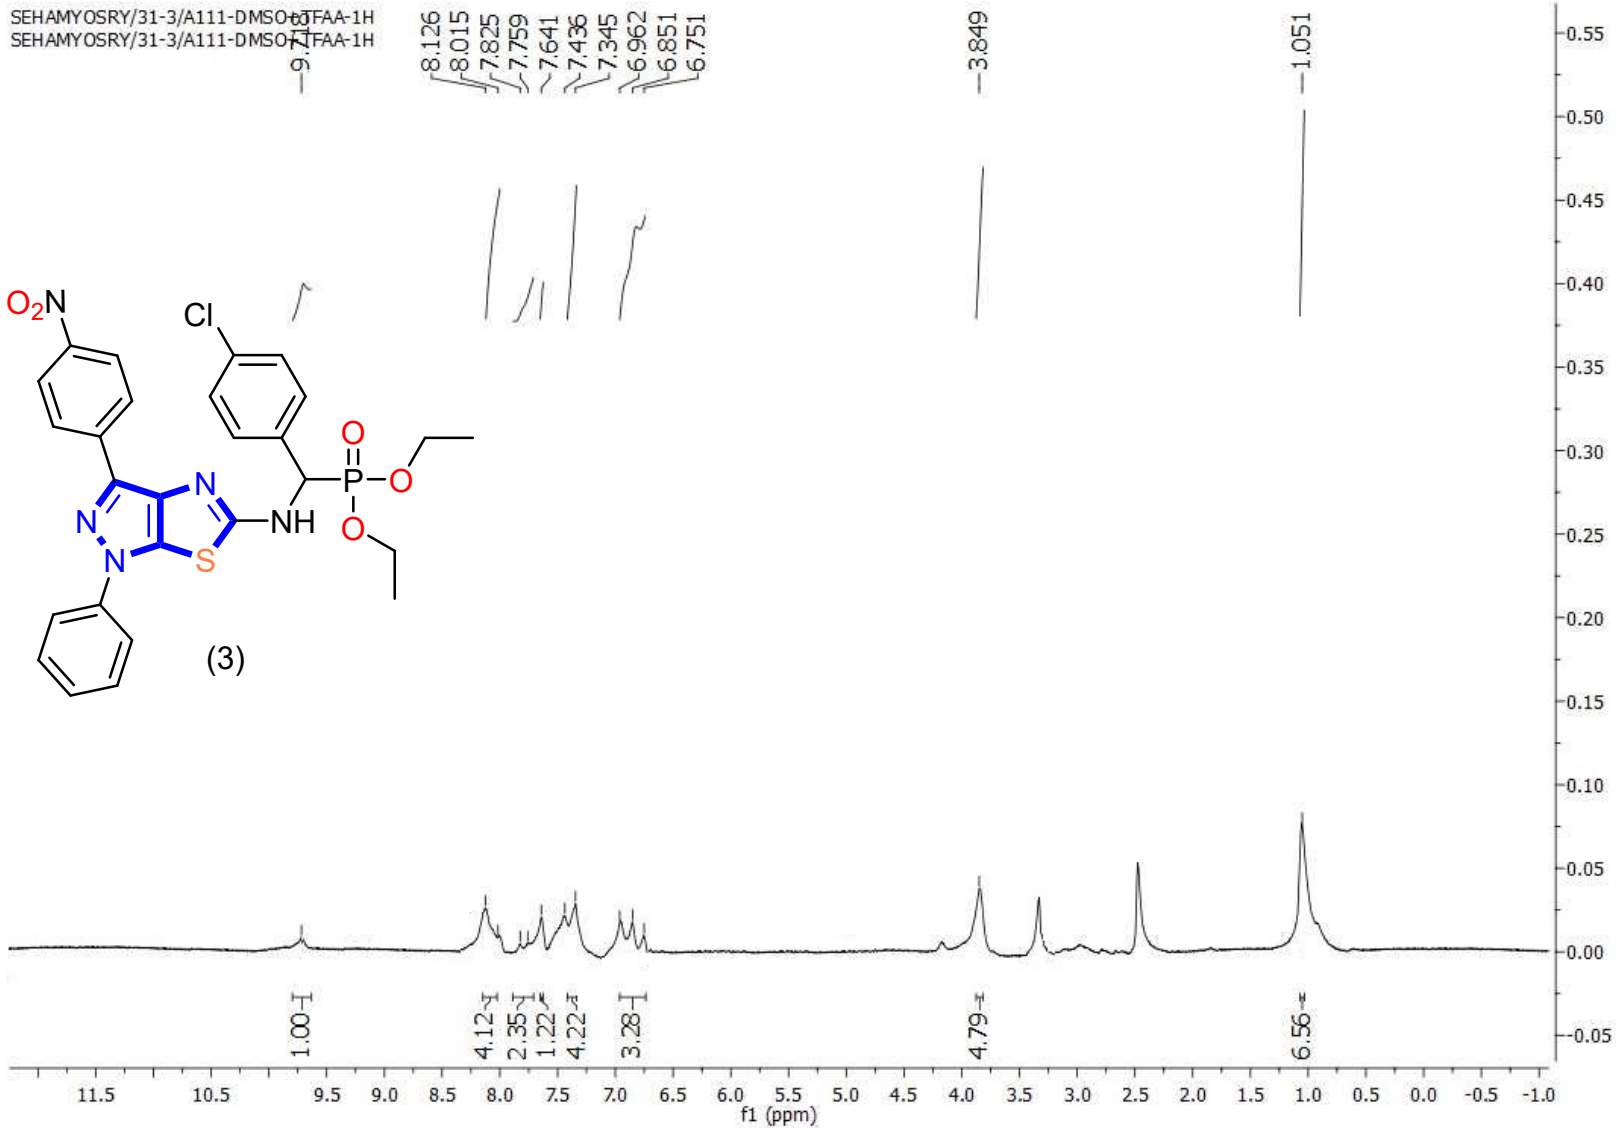

SEHAMYOSRY4-4-A111-DMSO-d6

145.57  
144.16  
138.68  
137.16  
135.85  
132.21  
130.28  
130.07  
128.92  
128.46  
125.39  
122.55  
120.27  
119.74  
119.37  
117.43  
112.53  
108.90

-66.80

-59.58

-12.23

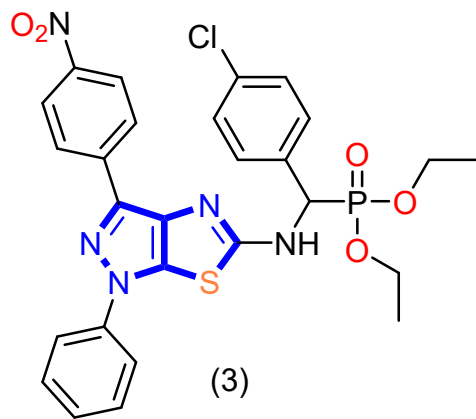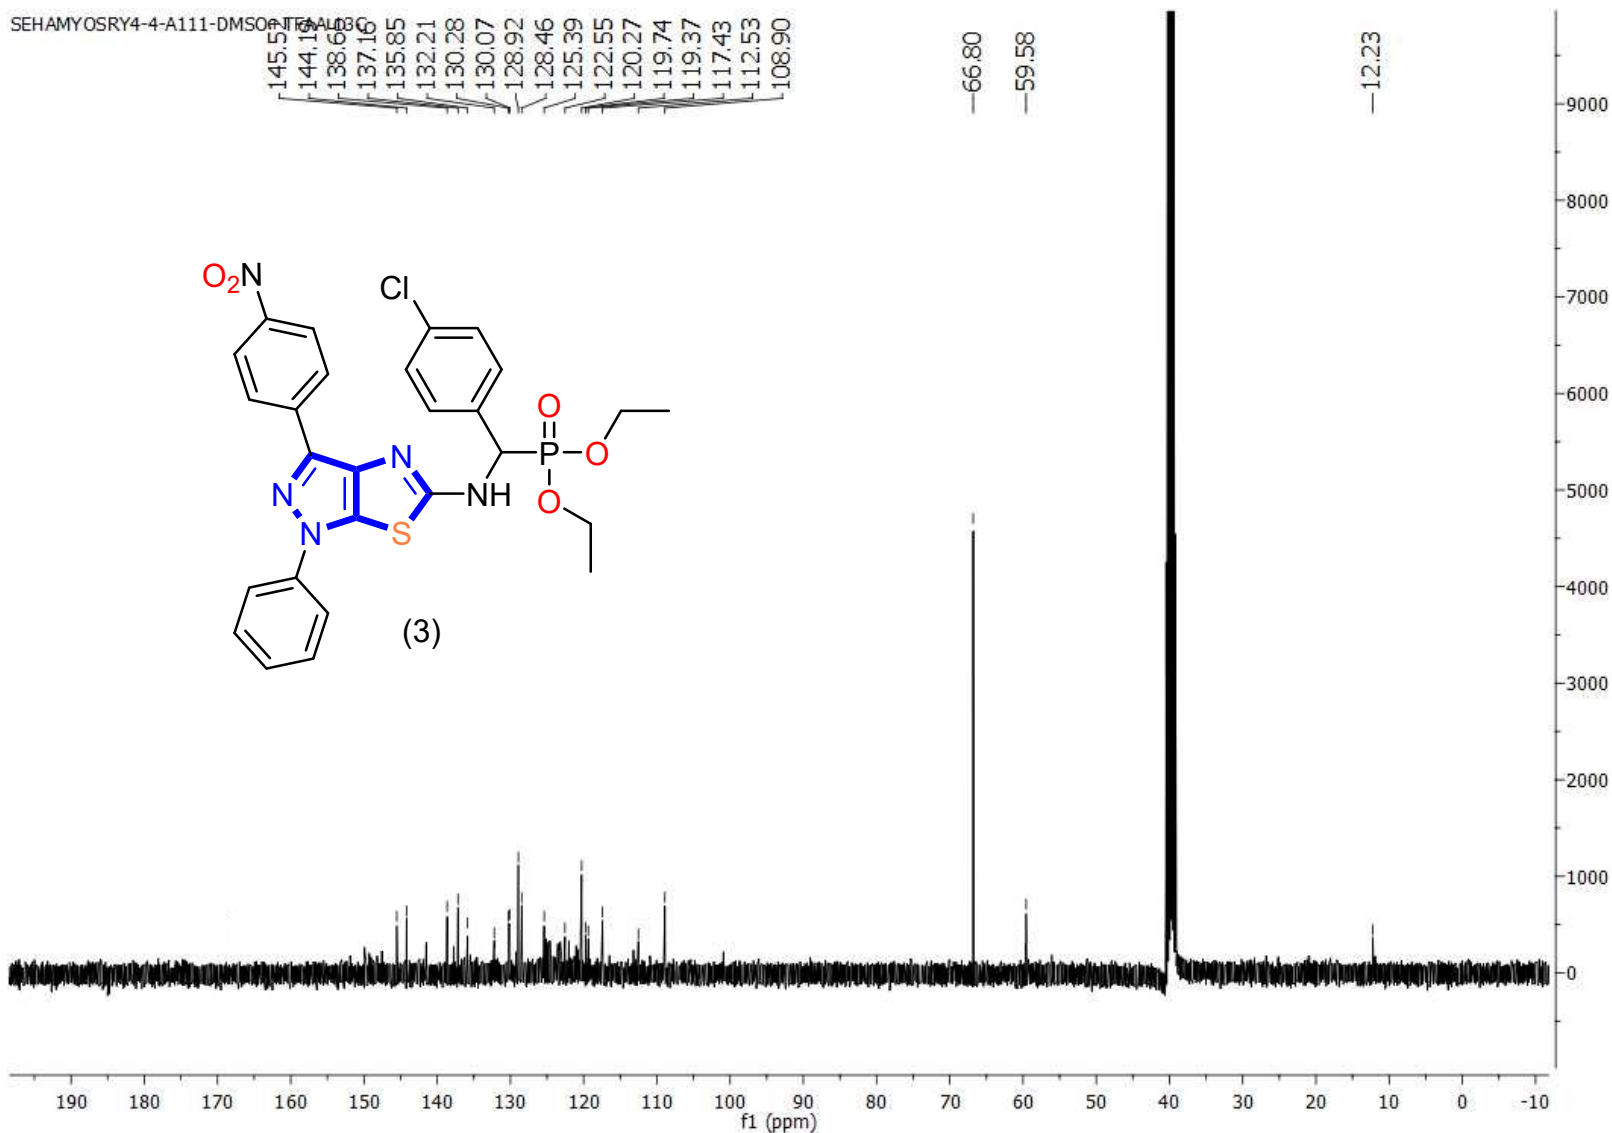

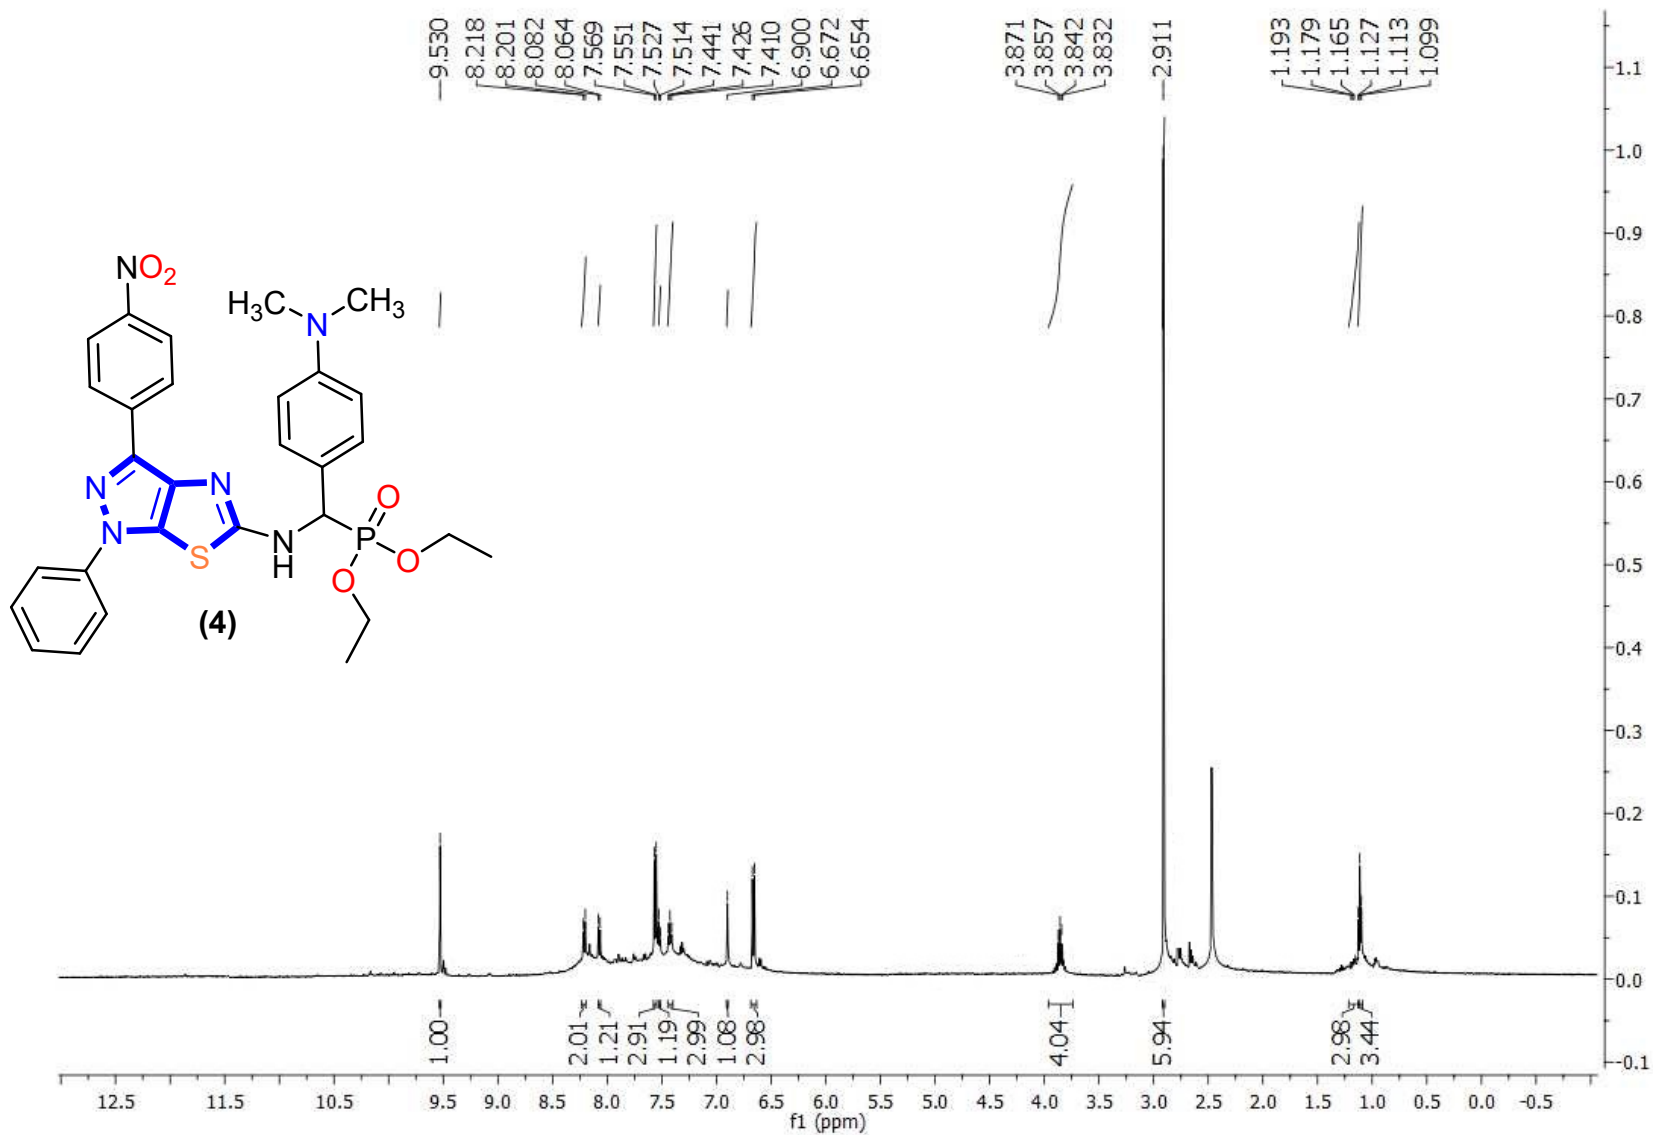

SEHAMYOSRY4-4-A107-DMSO-FAA

146.41  
143.79  
139.35  
137.87  
133.86  
133.11  
130.64  
129.18  
129.00  
128.57  
124.81  
122.97  
122.73  
121.94  
119.98  
119.71

~66.81  
~64.00

—35.33

—22.05

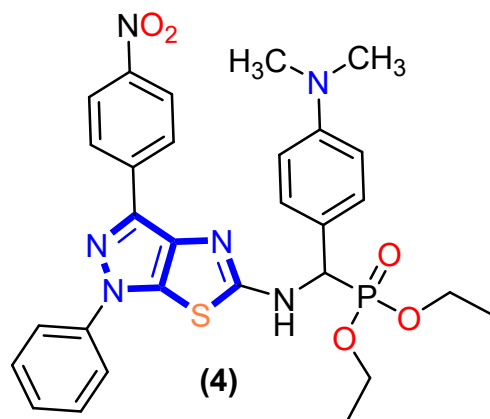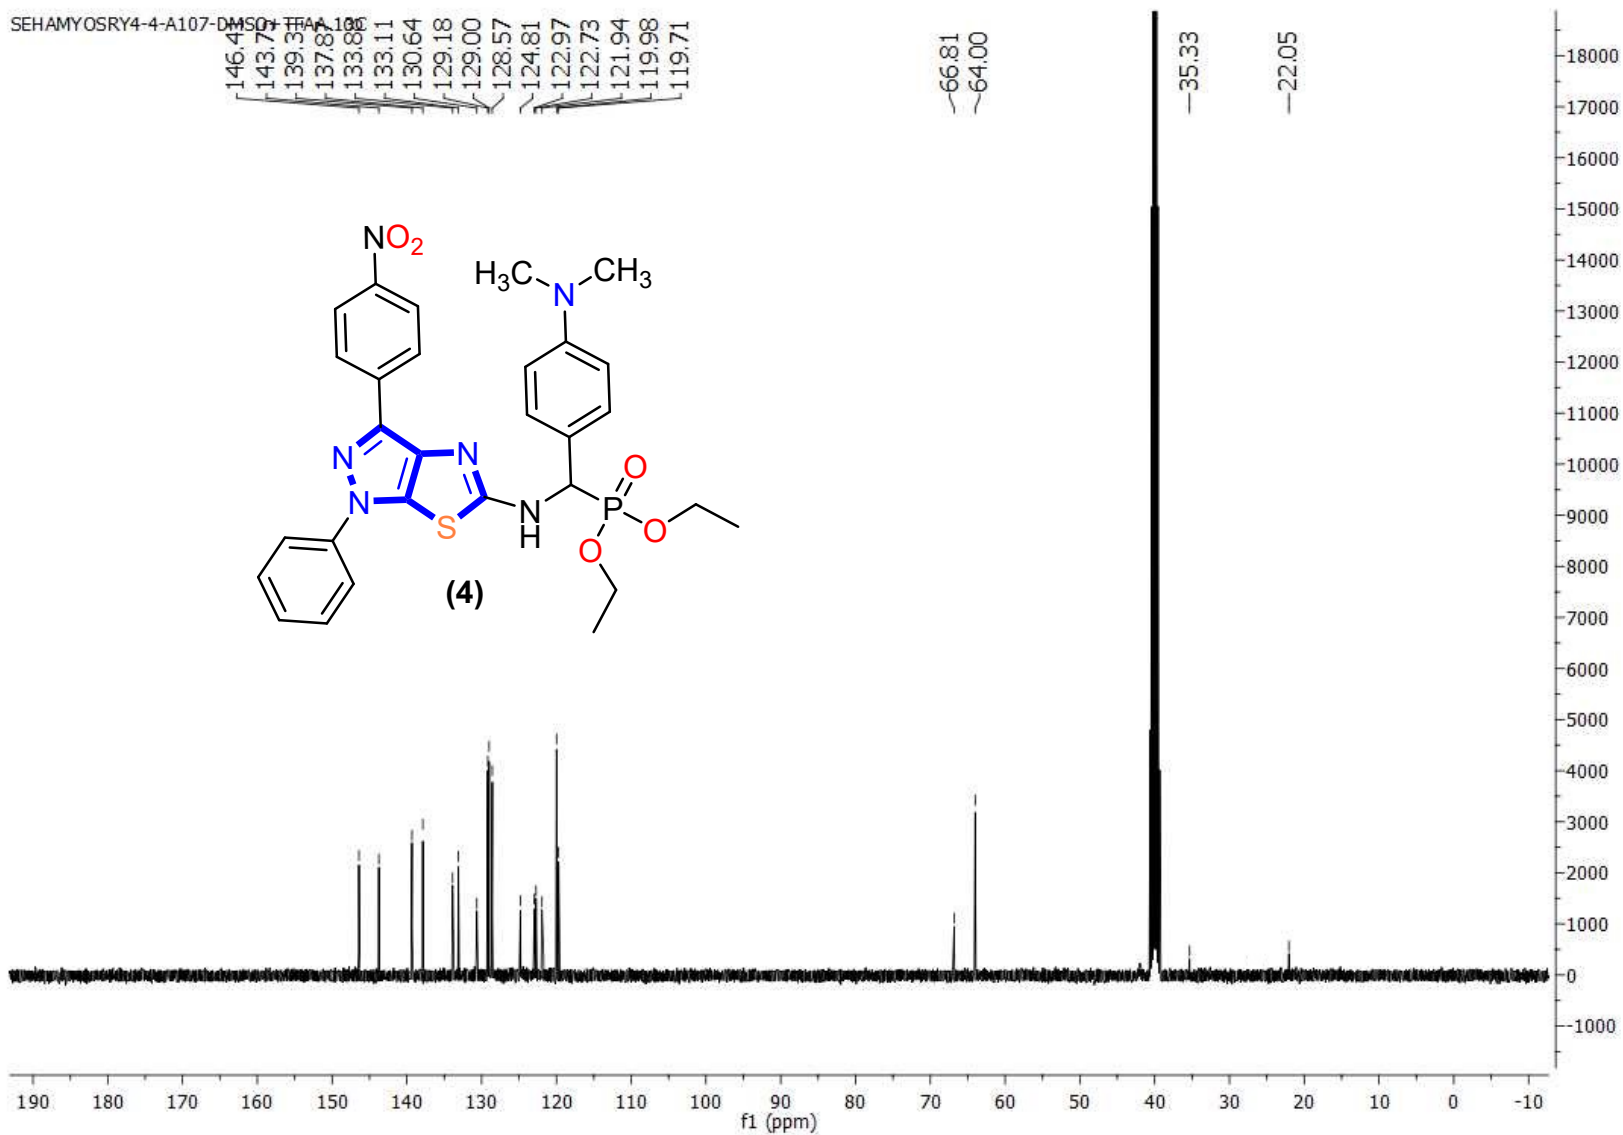



SEHAMYOSRY/31-3/M6-DMSO-d6-FAA-1H  
SEHAMYOSRY/31-3/M6-DMSO-d6-FAA-1H

8.152  
8.137  
8.033  
8.016  
7.483  
7.469  
7.239  
7.223  
7.163  
7.147  
7.103  
7.087  
7.071  
6.993  
6.978  
6.963  
6.619  
6.602  
6.586

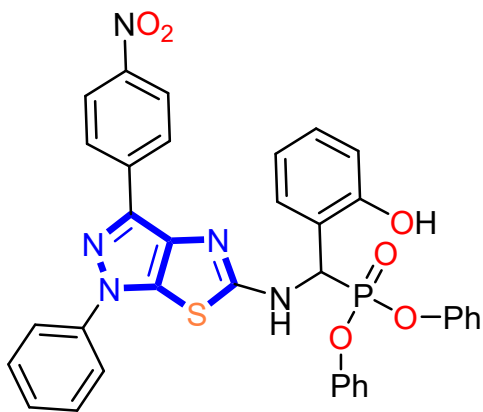

(5a)

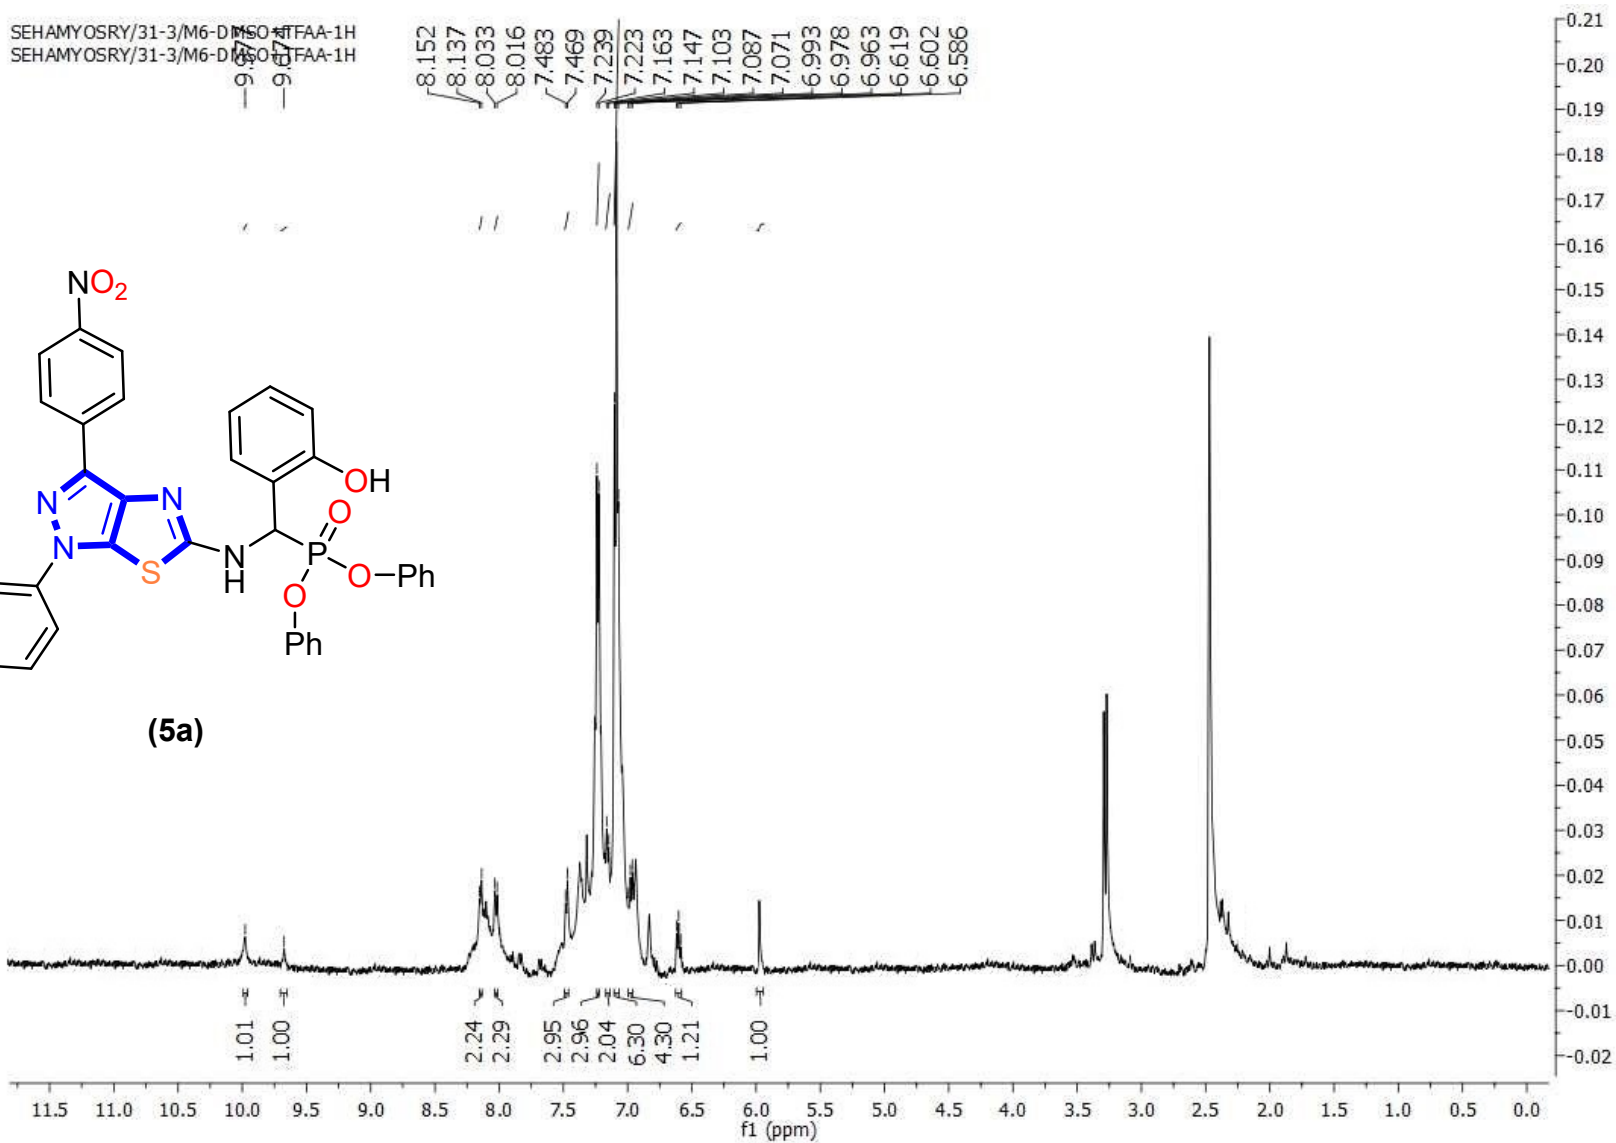

SEHAMYOSRY4-4-M6-00199-17-A

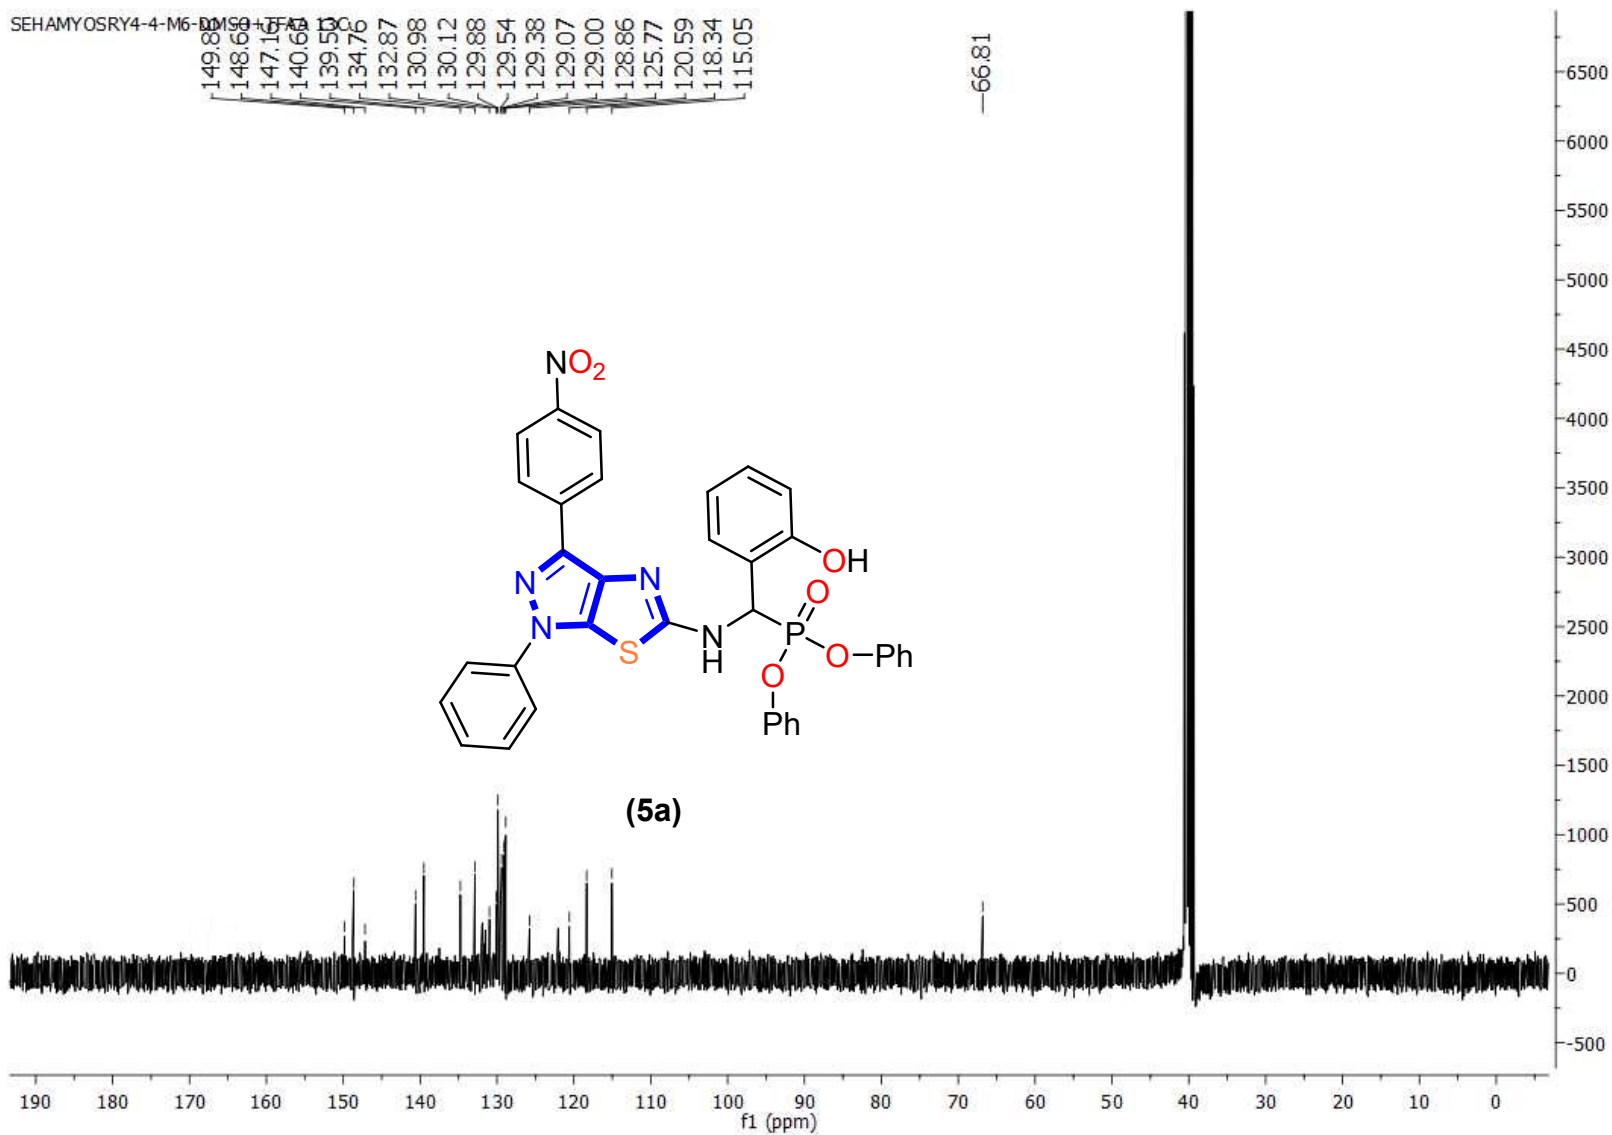

SEHAMYOSRY/31-3/M5-DMSO+TFAA-1H  
SEHAMYOSRY/31-3/M5-DMSO+TFAA-1H

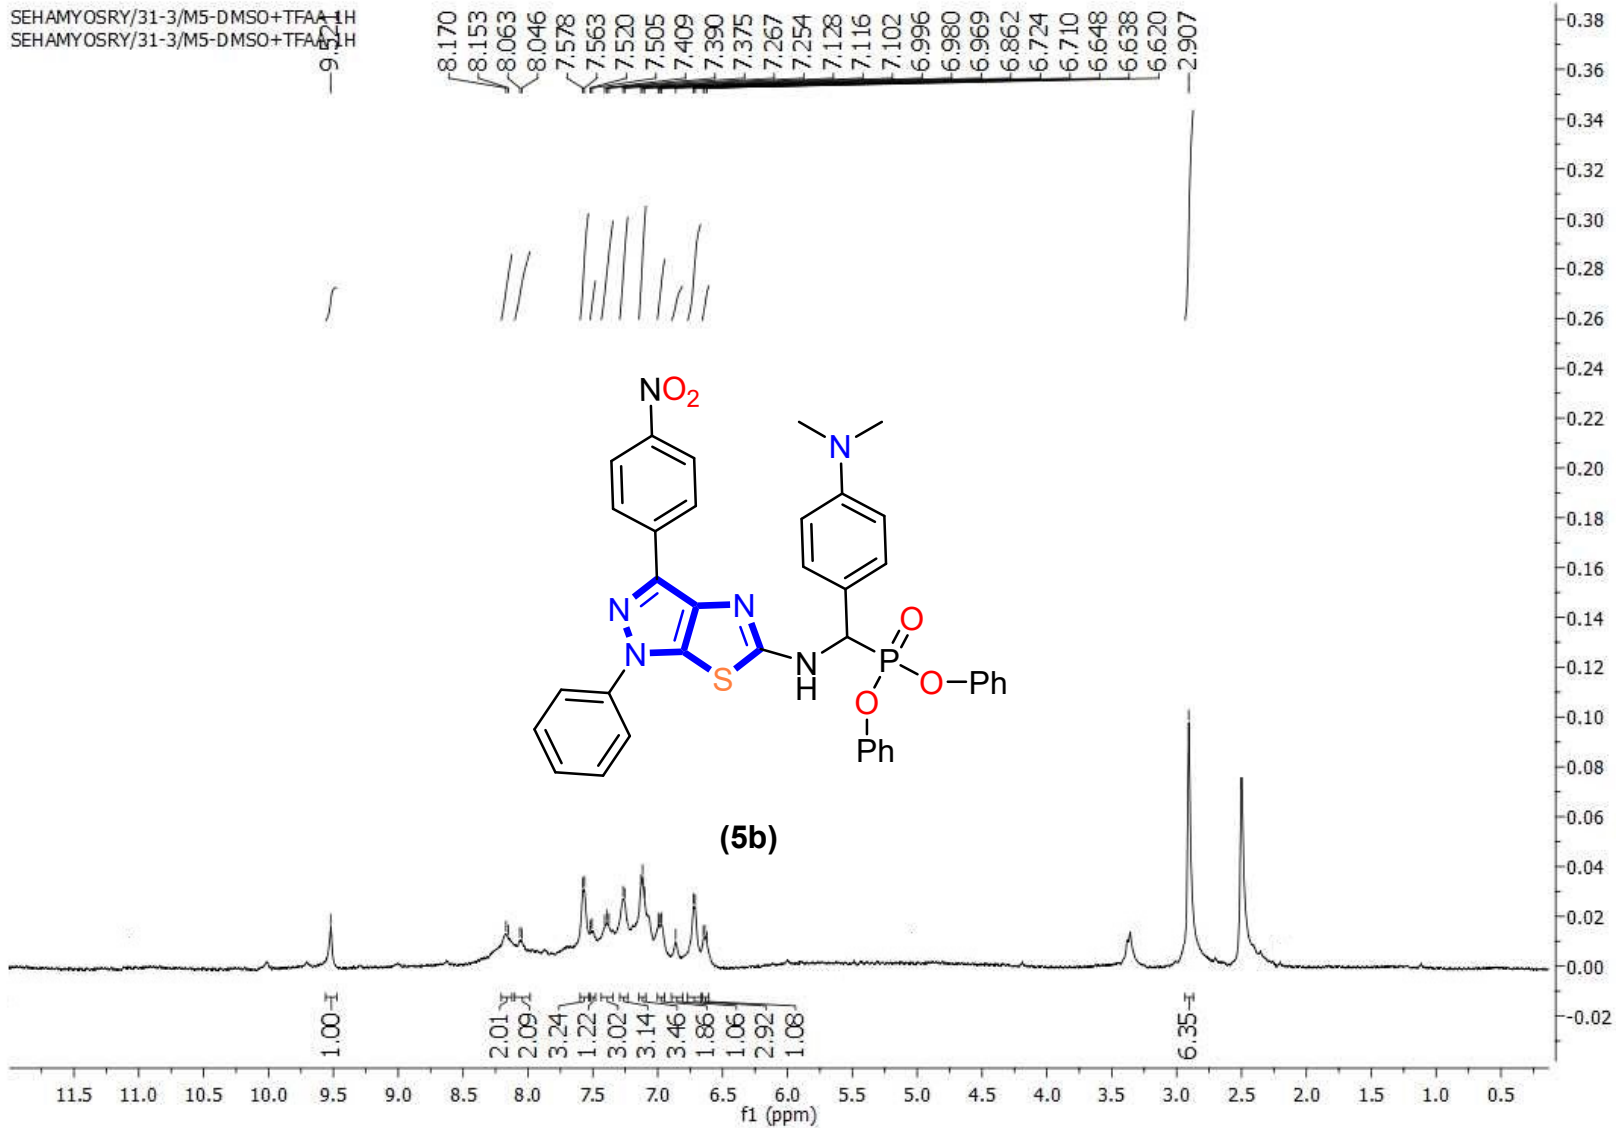

SEHAMYOSRY4-4-M5-DMSO-d6-TFA

146.48  
143.75  
139.35  
137.87  
133.88  
133.11  
130.64  
129.18  
129.00  
128.57  
124.81  
122.97  
122.73  
121.94  
119.98  
119.71

64.00

35.33

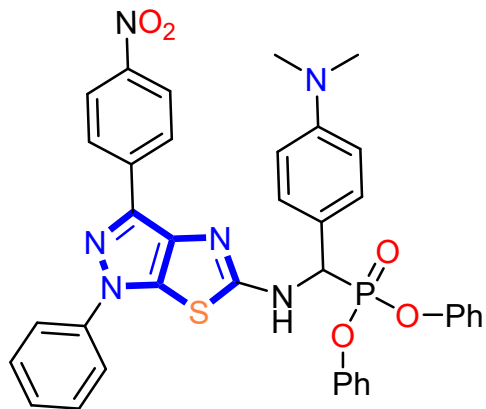

(5b)

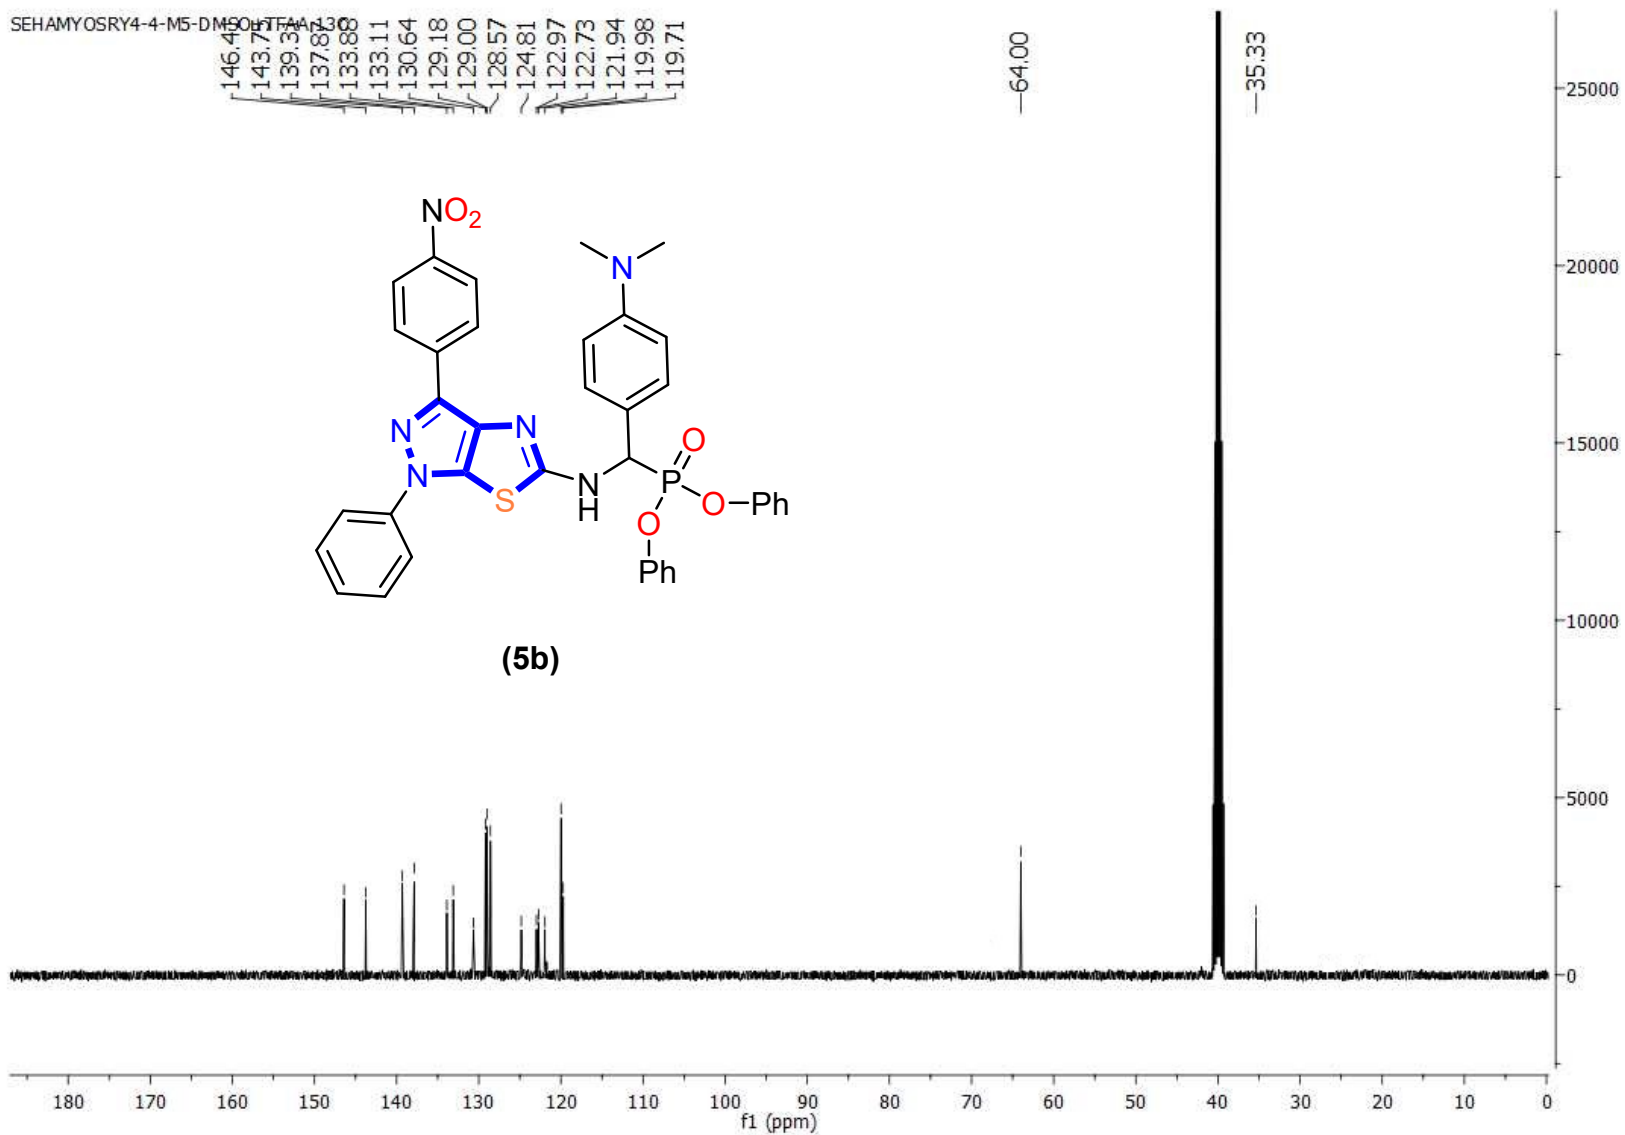

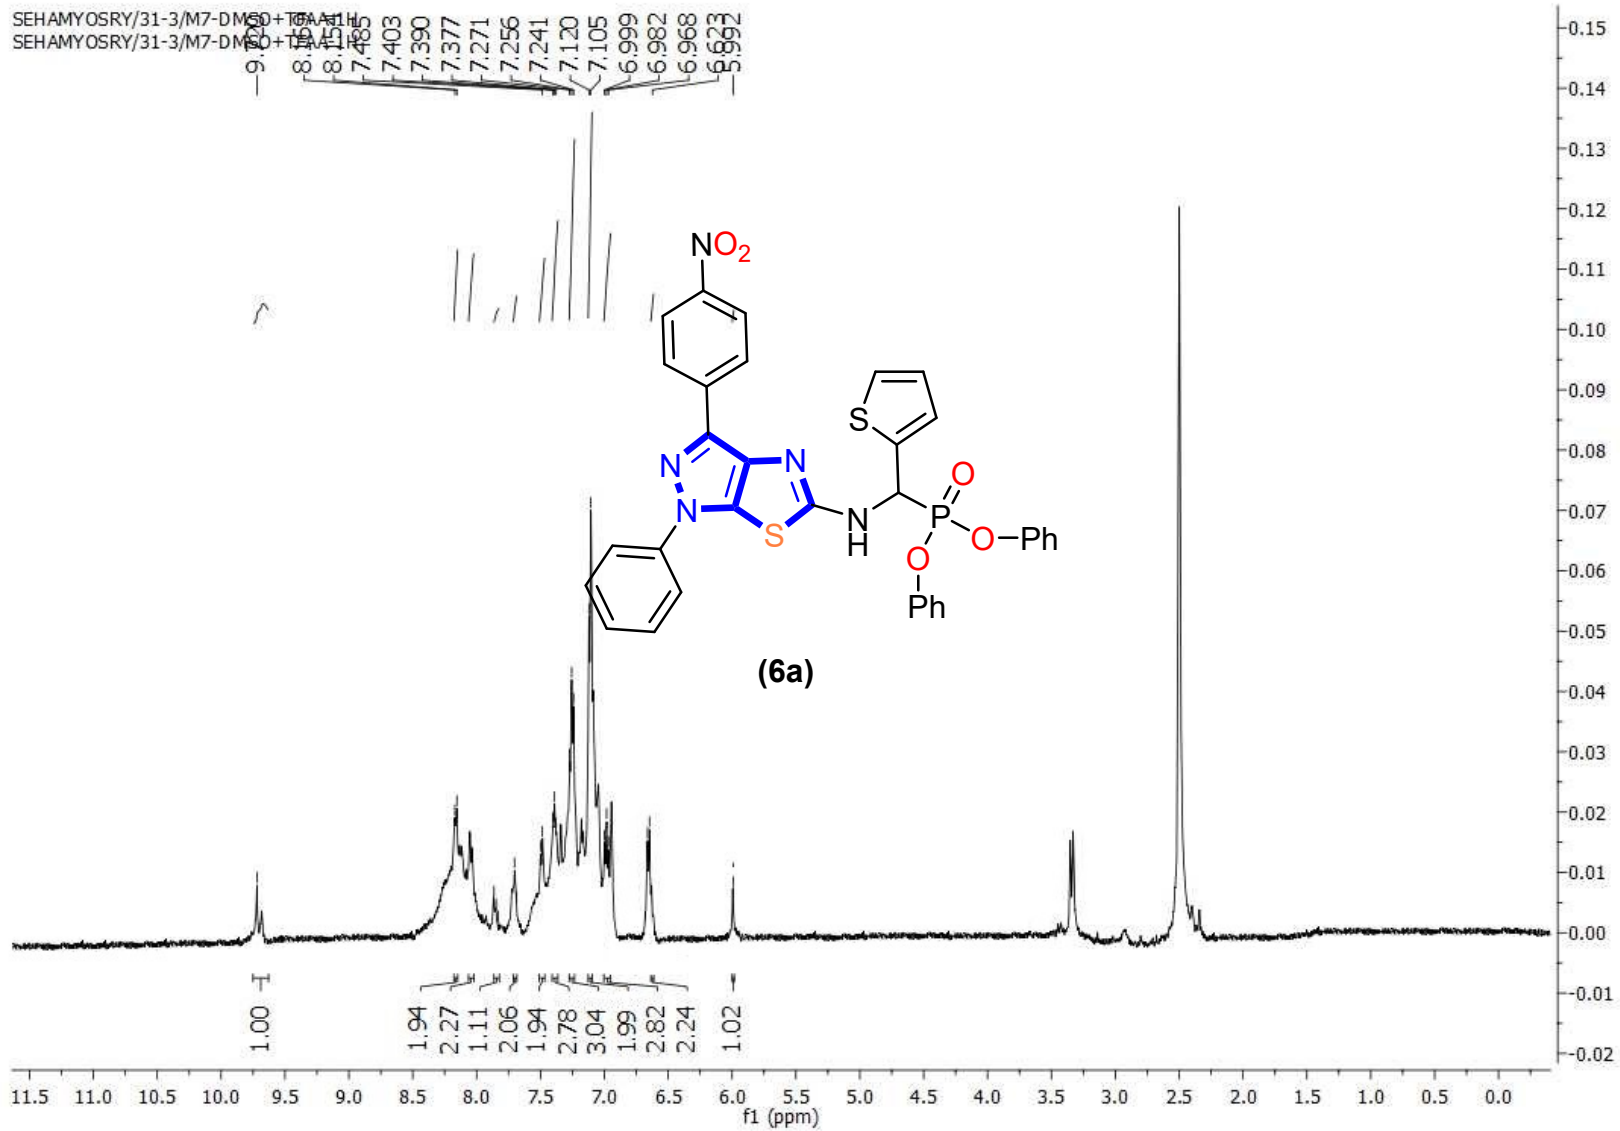

SEHAMYOSRY4-4-M7-DMSO+TFAA 13C

149.35  
147.92  
146.50  
144.83  
140.62  
138.62  
136.99  
134.20  
129.49  
128.88  
128.03  
121.95  
121.18  
120.65  
114.41

-66.84

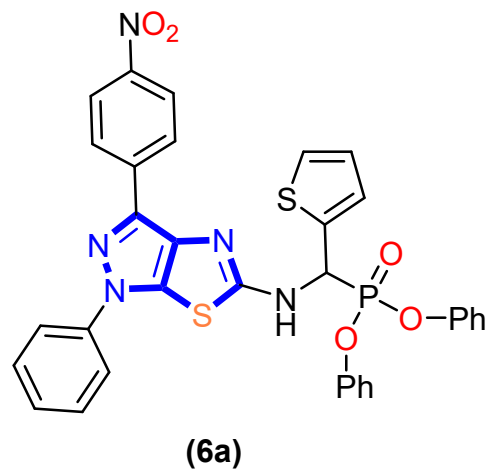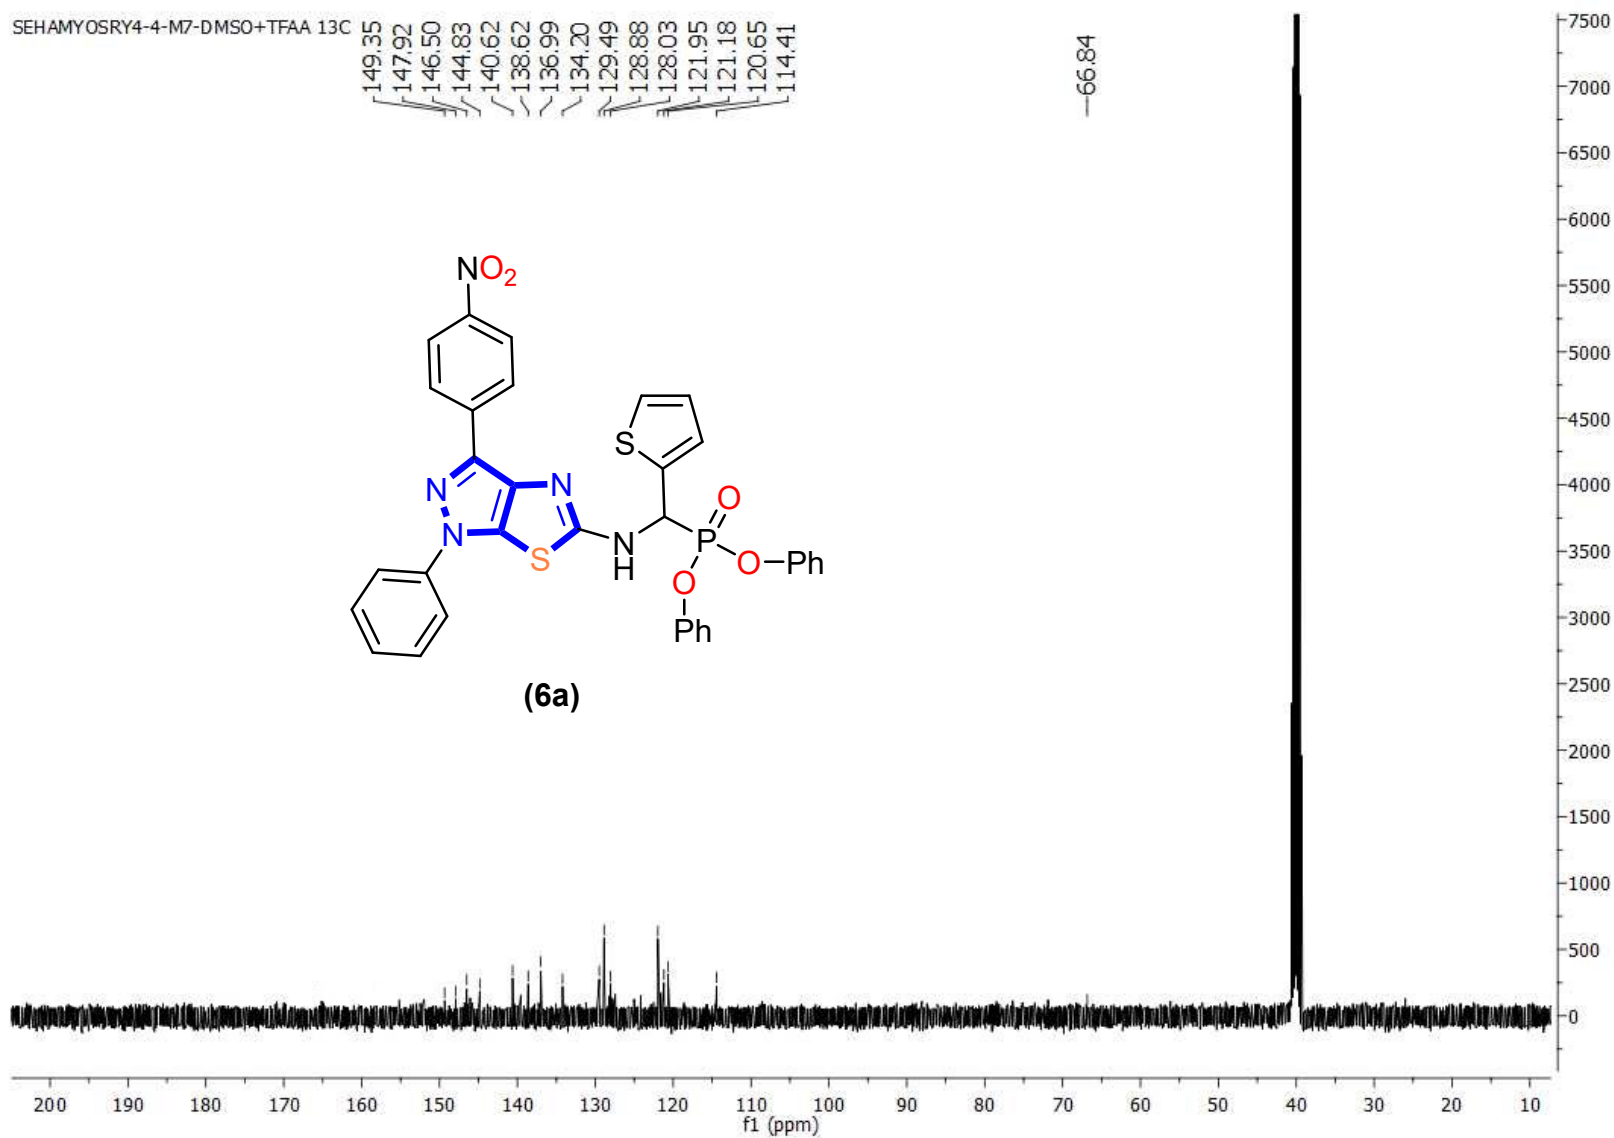

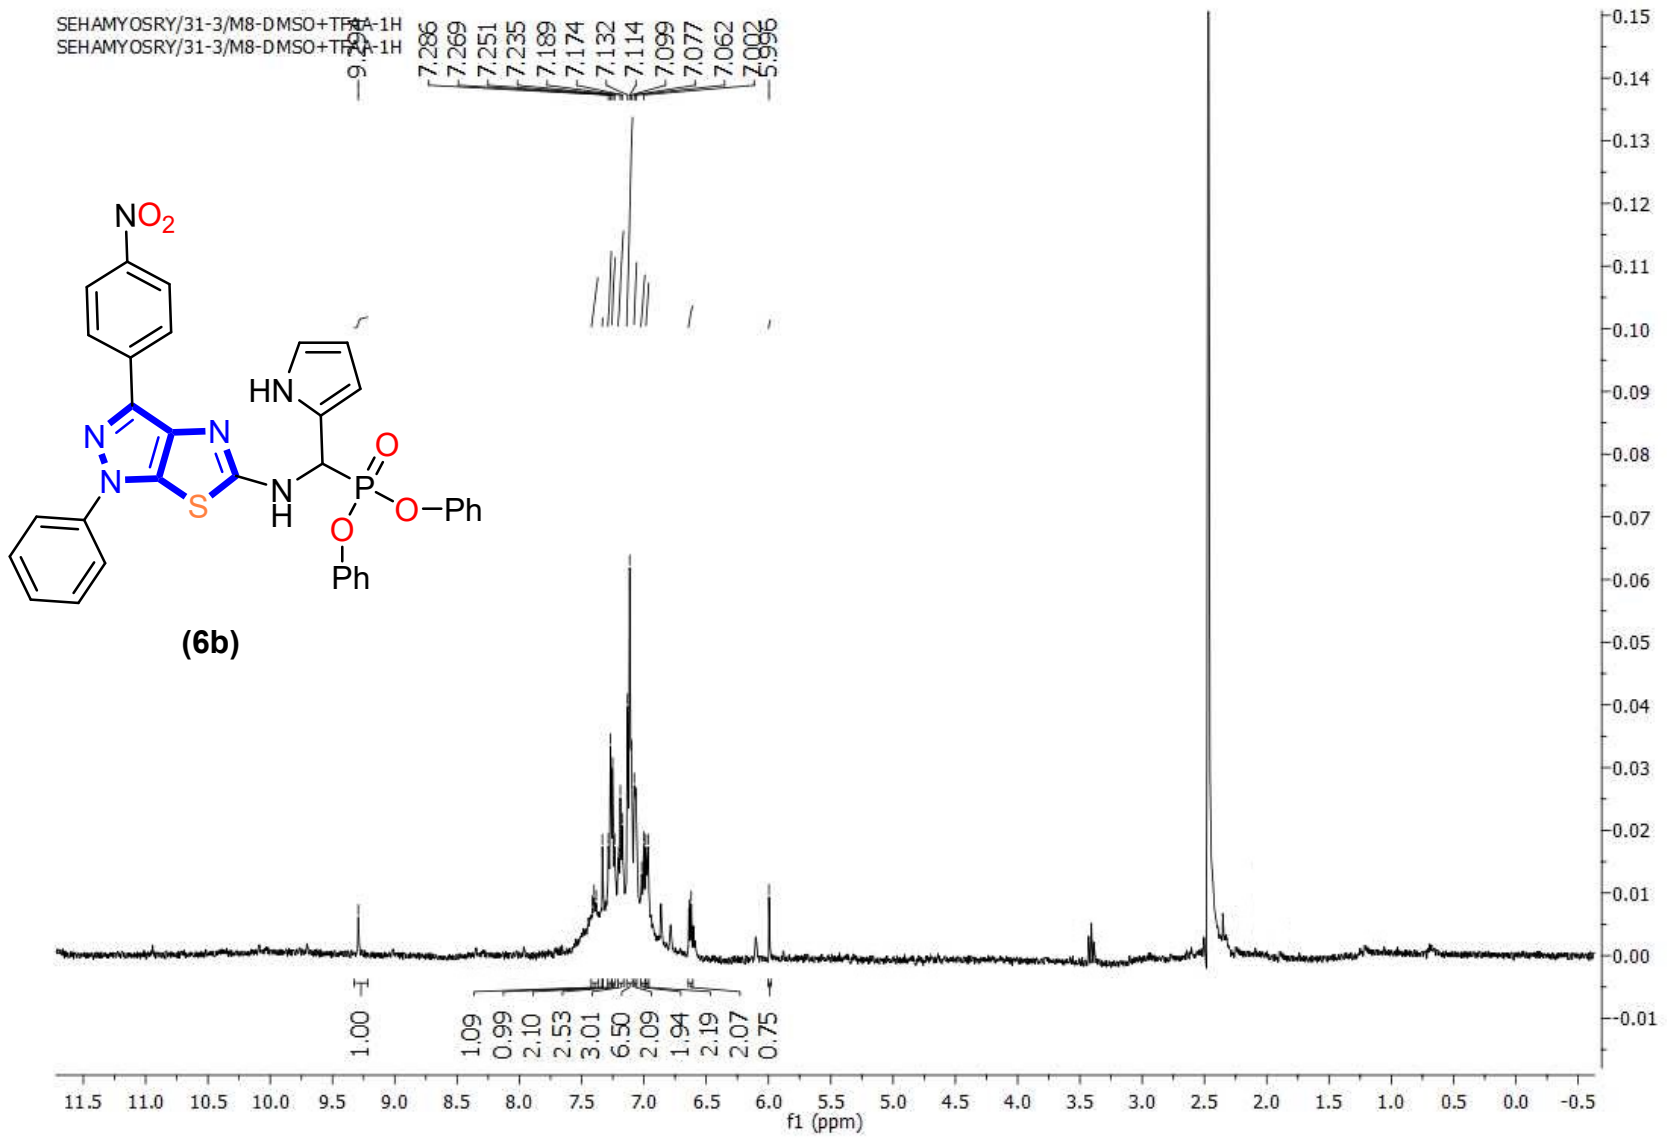





**BNL Cell Line:**

| <b>5a</b>    | <b>Raw data</b> |        |        | <b>Blank Corrected Data</b> |         |         | <b>Viability %</b> |         |         |         |                   |
|--------------|-----------------|--------|--------|-----------------------------|---------|---------|--------------------|---------|---------|---------|-------------------|
| <b>Conc</b>  | 1               |        |        | 2                           |         |         | 3                  |         |         | Mean    | STD               |
| <b>C</b>     | 2.8672          | 2.8849 | 2.7978 | 2.82993                     | 2.84763 | 2.76053 | 100                | 100     | 100     | 100     | <b>0</b>          |
| <b>0.01</b>  | 2.8808          | 2.9186 | 2.9121 | 2.84353                     | 2.88133 | 2.87483 | 101.096            | 102.44  | 102.209 | 101.915 | <b>0.58668839</b> |
| <b>0.1</b>   | 2.9428          | 2.9096 | 2.8283 | 2.90553                     | 2.87233 | 2.79103 | 103.301            | 102.12  | 99.2297 | 101.55  | <b>1.71008789</b> |
| <b>1</b>     | 2.8005          | 2.6718 | 2.6261 | 2.76323                     | 2.63453 | 2.58883 | 98.2413            | 98.6656 | 96.0409 | 97.6493 | <b>2.62514003</b> |
| <b>10</b>    | 2.6503          | 2.5339 | 2.6211 | 2.61303                     | 2.49663 | 2.58383 | 95.3482            | 95.2098 | 96.3101 | 95.6227 | <b>1.75800603</b> |
| <b>100</b>   | 2.4549          | 2.5035 | 2.4491 | 2.41763                     | 2.46623 | 2.41183 | 92.8481            | 95.576  | 94.6419 | 94.3554 | <b>0.86722831</b> |
| <b>Blank</b> | 0.036           | 0.0393 | 0.0365 | Blank Average               |         | 0.03727 | Control average    |         | 2.8127  |         |                   |

| <b>5b</b>    | <b>Raw data</b> |        |        | <b>Blank Corrected Data</b> |        |        | <b>Viability %</b> |          |          |          |                   |
|--------------|-----------------|--------|--------|-----------------------------|--------|--------|--------------------|----------|----------|----------|-------------------|
| <b>Conc</b>  | 1               |        |        | 2                           |        |        | 3                  |          |          | Mean     | STD               |
| <b>C</b>     | 2.818           | 2.8789 | 2.8446 | 2.7818                      | 2.8427 | 2.8084 | 100                | 100      | 100      | 100      | <b>0</b>          |
| <b>0.01</b>  | 2.8461          | 2.8631 | 2.8191 | 2.8099                      | 2.8269 | 2.7829 | 99.9621            | 100.567  | 99.0015  | 99.8435  | <b>0.64450797</b> |
| <b>0.1</b>   | 2.839           | 2.8729 | 2.7879 | 2.8028                      | 2.8367 | 2.7517 | 99.7095            | 100.915  | 97.8916  | 99.5055  | <b>1.24288625</b> |
| <b>1</b>     | 2.0507          | 2.0642 | 2.2176 | 2.0145                      | 2.028  | 2.1814 | 93.6657            | 92.146   | 92.6032  | 92.805   | <b>2.69289347</b> |
| <b>10</b>    | 2.2301          | 2.2926 | 2.3126 | 2.1939                      | 2.2564 | 2.2764 | 86.89798           | 88.12142 | 87.83292 | 87.61744 | <b>1.25005447</b> |
| <b>100</b>   | 2.2092          | 2.1974 | 2.2946 | 2.173                       | 2.1612 | 2.2584 | 73.15447           | 73.73468 | 72.19257 | 73.02724 | <b>1.54067969</b> |
| <b>Blank</b> | 0.0375          | 0.0355 | 0.0356 | Blank Average               |        | 0.0362 | Control average    |          | 2.81097  |          |                   |

| <b>Dox</b>   | <b>Raw data</b> |        |        | <b>Blank Corrected Data</b> |        |        | <b>Viability %</b> |         |         |         |                   |
|--------------|-----------------|--------|--------|-----------------------------|--------|--------|--------------------|---------|---------|---------|-------------------|
| <b>Conc</b>  | 1               |        |        | 2                           |        |        | 3                  |         |         | Mean    | STD               |
| <b>C</b>     | 2.7691          | 2.7738 | 2.8972 | 2.7328                      | 2.7375 | 2.8609 | 100                | 100     | 100     | 100     | <b>0</b>          |
| <b>0.01</b>  | 2.7839          | 2.765  | 2.8297 | 2.7476                      | 2.7287 | 2.7934 | 98.9389            | 98.2584 | 100.588 | 99.2618 | <b>0.97815396</b> |
| <b>0.1</b>   | 2.7736          | 2.7421 | 2.839  | 2.7373                      | 2.7058 | 2.8027 | 98.568             | 97.4337 | 100.923 | 98.9749 | <b>1.45326531</b> |
| <b>1</b>     | 2.6501          | 2.5414 | 2.561  | 2.6138                      | 2.5051 | 2.5247 | 94.1209            | 90.2067 | 90.9125 | 91.7467 | <b>1.70336502</b> |
| <b>10</b>    | 1.6712          | 1.8409 | 1.8259 | 1.6349                      | 1.8046 | 1.7896 | 58.8715            | 64.9822 | 64.4421 | 62.7653 | <b>2.76214621</b> |
| <b>100</b>   | 0.2462          | 0.2203 | 0.2332 | 0.2099                      | 0.184  | 0.1969 | 7.55833            | 6.6257  | 7.09022 | 7.09142 | <b>0.38074912</b> |
| <b>Blank</b> | 0.0363          | 0.0357 | 0.0369 | Blank Average               |        | 0.0363 | Control average    |         | 2.77707 |         |                   |

**Vero Cell Line:**

| <b>5a</b>    | <b>Raw data</b> |        |        | <b>Blank Corrected Data</b> |         |         | <b>Viability %</b> |         |         |         |                   |
|--------------|-----------------|--------|--------|-----------------------------|---------|---------|--------------------|---------|---------|---------|-------------------|
| <b>Conc</b>  | 1               |        |        | 2                           |         |         | 3                  |         |         | Mean    | STD               |
| <b>C</b>     | 2.2275          | 2.2424 | 2.2214 | 2.18967                     | 2.20457 | 2.18357 | 100                | 100     | 100     | 100     | <b>0</b>          |
| <b>0.01</b>  | 2.2582          | 2.2145 | 2.2332 | 2.22037                     | 2.17667 | 2.19537 | 101.266            | 99.2733 | 100.126 | 100.222 | <b>0.81648004</b> |
| <b>0.1</b>   | 2.271           | 2.1215 | 2.1788 | 2.23317                     | 2.08367 | 2.14097 | 101.85             | 95.0318 | 97.6451 | 98.1757 | <b>2.80876461</b> |
| <b>1</b>     | 2.1751          | 2.1102 | 2.1981 | 2.13727                     | 2.07237 | 2.16027 | 97.4764            | 94.5164 | 98.5253 | 96.8394 | <b>1.69749159</b> |
| <b>10</b>    | 2.1011          | 2.0982 | 2.1112 | 2.06327                     | 2.06037 | 2.07337 | 94.1014            | 93.9691 | 94.562  | 94.2108 | <b>0.2541254</b>  |
| <b>100</b>   | 1.7391          | 1.8353 | 1.8759 | 1.70127                     | 1.79747 | 1.83807 | 77.5913            | 81.9788 | 83.8305 | 81.1335 | <b>2.61631579</b> |
| <b>Blank</b> | 0.0361          | 0.0405 | 0.0369 | Blank Average               |         | 0.03783 | Control average    |         | 2.1926  |         |                   |

| <b>5b</b>    | <b>Raw data</b> |        |        | <b>Blank Corrected Data</b> |         |         | <b>Viability %</b> |         |         |         |                   |
|--------------|-----------------|--------|--------|-----------------------------|---------|---------|--------------------|---------|---------|---------|-------------------|
| <b>Conc</b>  | 1               |        |        | 2                           |         |         | 3                  |         |         | Mean    | STD               |
| <b>C</b>     | 2.1786          | 2.187  | 2.2329 | 2.14063                     | 2.14903 | 2.19493 | 100                | 100     | 100     | 100     | <b>0</b>          |
| <b>0.01</b>  | 2.1276          | 2.221  | 2.2321 | 2.08963                     | 2.18303 | 2.19413 | 96.6737            | 100.995 | 101.508 | 99.7255 | <b>2.16814043</b> |
| <b>0.1</b>   | 2.1534          | 2.1253 | 2.2214 | 2.11543                     | 2.08733 | 2.18343 | 97.8673            | 96.5673 | 101.013 | 98.4826 | <b>1.8664576</b>  |
| <b>1</b>     | 2.142           | 2.1196 | 2.1599 | 2.10403                     | 2.08163 | 2.12193 | 97.3399            | 96.3035 | 98.168  | 97.2705 | <b>0.76272523</b> |
| <b>10</b>    | 2.1081          | 2.1141 | 2.0799 | 2.07013                     | 2.07613 | 2.04193 | 95.7715            | 96.0491 | 94.4669 | 95.4292 | <b>0.68980658</b> |
| <b>100</b>   | 2.1147          | 2.1149 | 2.0125 | 2.07673                     | 2.07693 | 1.97453 | 96.0769            | 96.0861 | 91.3487 | 94.5039 | <b>2.23104362</b> |
| <b>Blank</b> | 0.0379          | 0.0384 | 0.0376 | Blank Average               |         | 0.03797 | Control average    |         | 2.16153 |         |                   |

| <b>Dox</b>   | <b>Raw data</b> |        |        | <b>Blank Corrected Data</b> |        |        | <b>Viability %</b> |         |         |         |                   |
|--------------|-----------------|--------|--------|-----------------------------|--------|--------|--------------------|---------|---------|---------|-------------------|
| <b>Conc</b>  | 1               |        |        | 2                           |        |        | 3                  |         |         | Mean    | STD               |
| <b>C</b>     | 2.2842          | 2.1646 | 2.1727 | 2.2472                      | 2.1276 | 2.1357 | 100                | 100     | 100     | 100     | <b>0</b>          |
| <b>0.01</b>  | 2.1596          | 2.2669 | 2.2626 | 2.1226                      | 2.2299 | 2.2256 | 97.8082            | 102.752 | 102.554 | 101.038 | <b>2.28550468</b> |
| <b>0.1</b>   | 1.9478          | 1.93   | 1.8365 | 1.9108                      | 1.893  | 1.7995 | 88.0485            | 87.2283 | 82.9199 | 86.0656 | <b>2.24940007</b> |
| <b>1</b>     | 0.9495          | 0.9422 | 0.9118 | 0.9125                      | 0.9052 | 0.8748 | 42.0475            | 41.7111 | 40.3103 | 41.3563 | <b>0.75227607</b> |
| <b>10</b>    | 0.3061          | 0.3133 | 0.2847 | 0.2691                      | 0.2763 | 0.2477 | 12.4               | 12.7317 | 11.4139 | 12.1819 | <b>0.55968729</b> |
| <b>100</b>   | 0.0701          | 0.0675 | 0.0608 | 0.0331                      | 0.0305 | 0.0238 | 1.52523            | 1.40542 | 1.09669 | 1.34245 | <b>0.18052834</b> |
| <b>Blank</b> | 0.0366          | 0.0365 | 0.0379 | Blank Average               |        | 0.037  | Control average    |         | 2.17017 |         |                   |

# Molecular docking figures

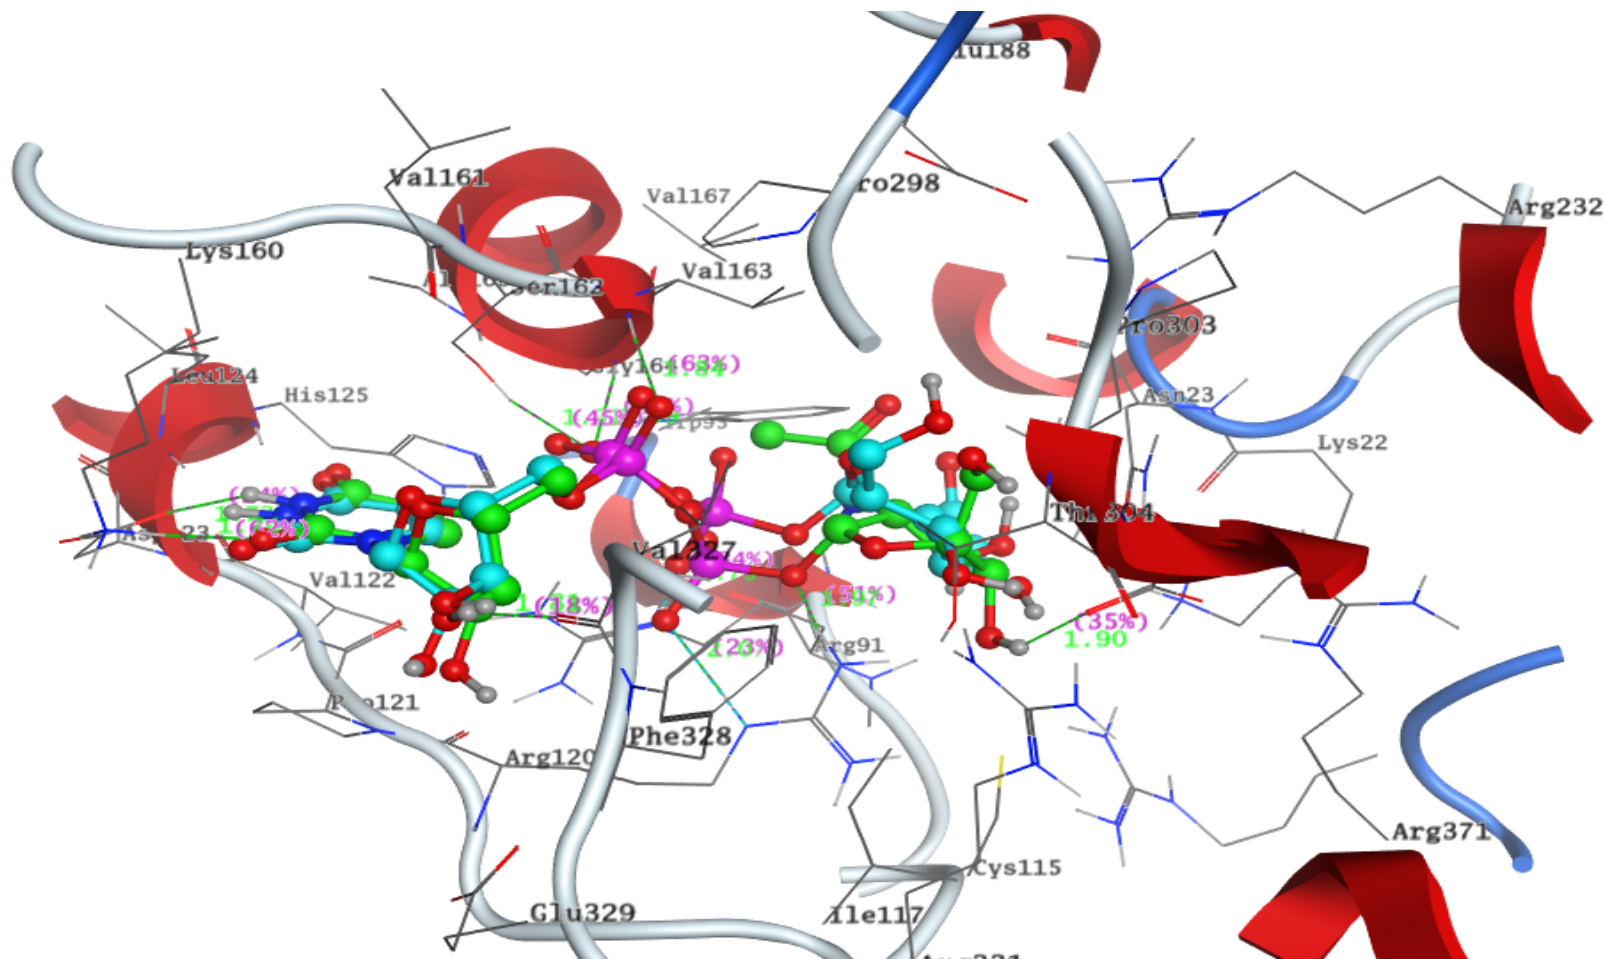

Superimposition of the co-crystallized ligand (**turquoise**) and the re-docked co-crystallized (**green**) through the validation process that exhibited that the co-crystallized ligand showed binding energy  $S = -17.69$  kcal/mol with RMSD = 1.53 Å.

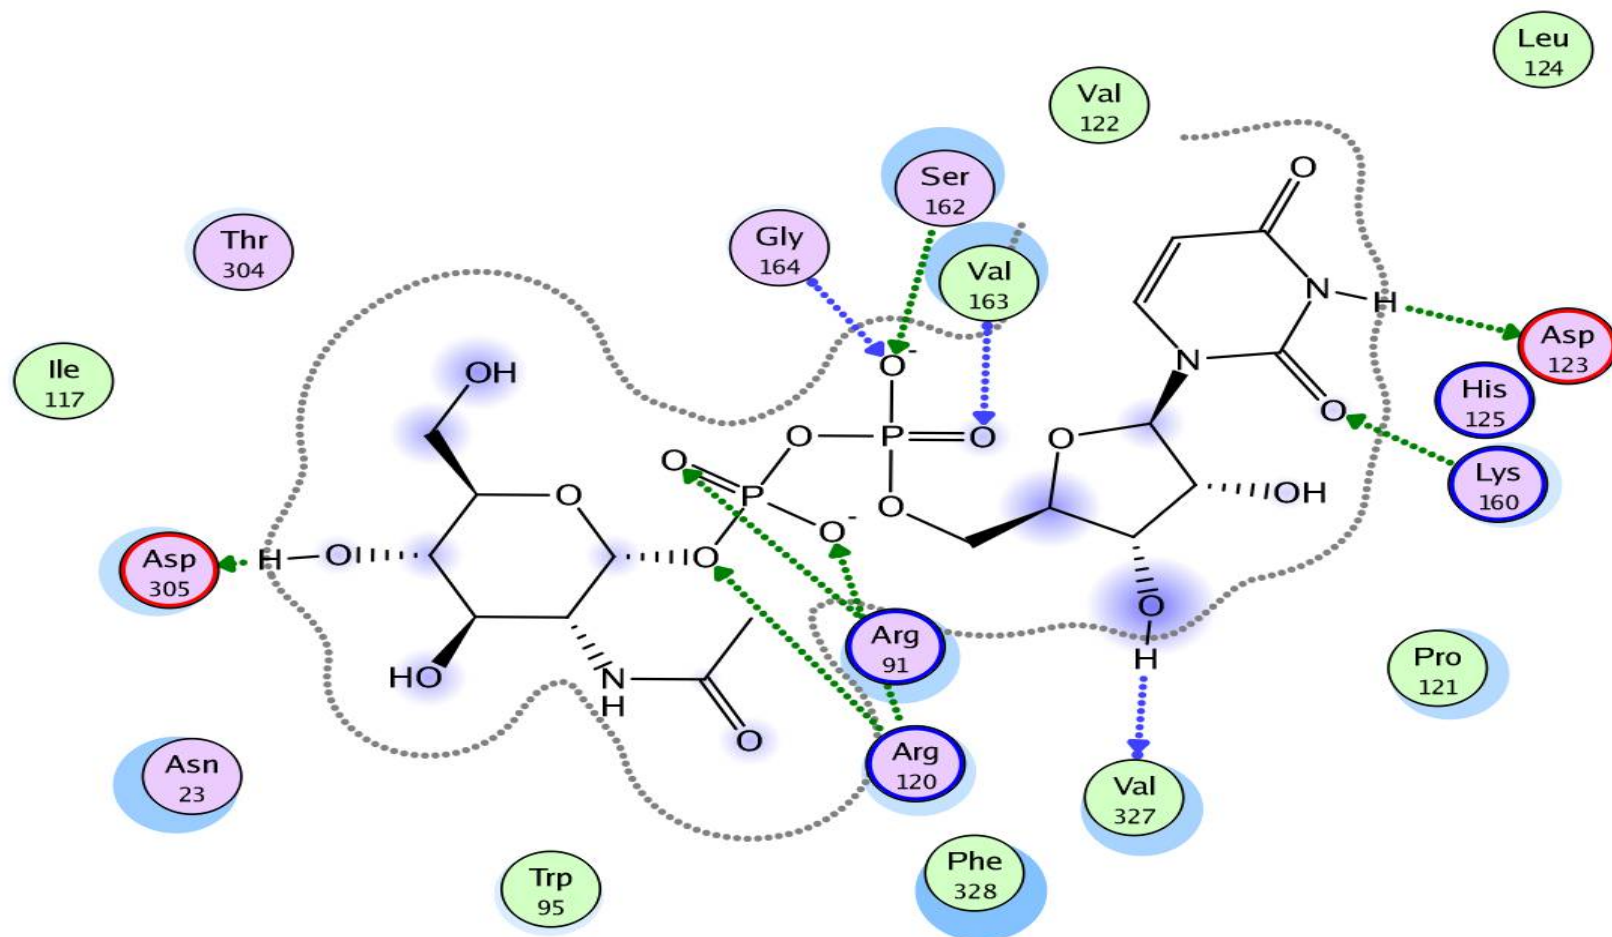

2D structure of **co-crystallized ligand** inside the active site of Mur A (PDB: 1AUE)

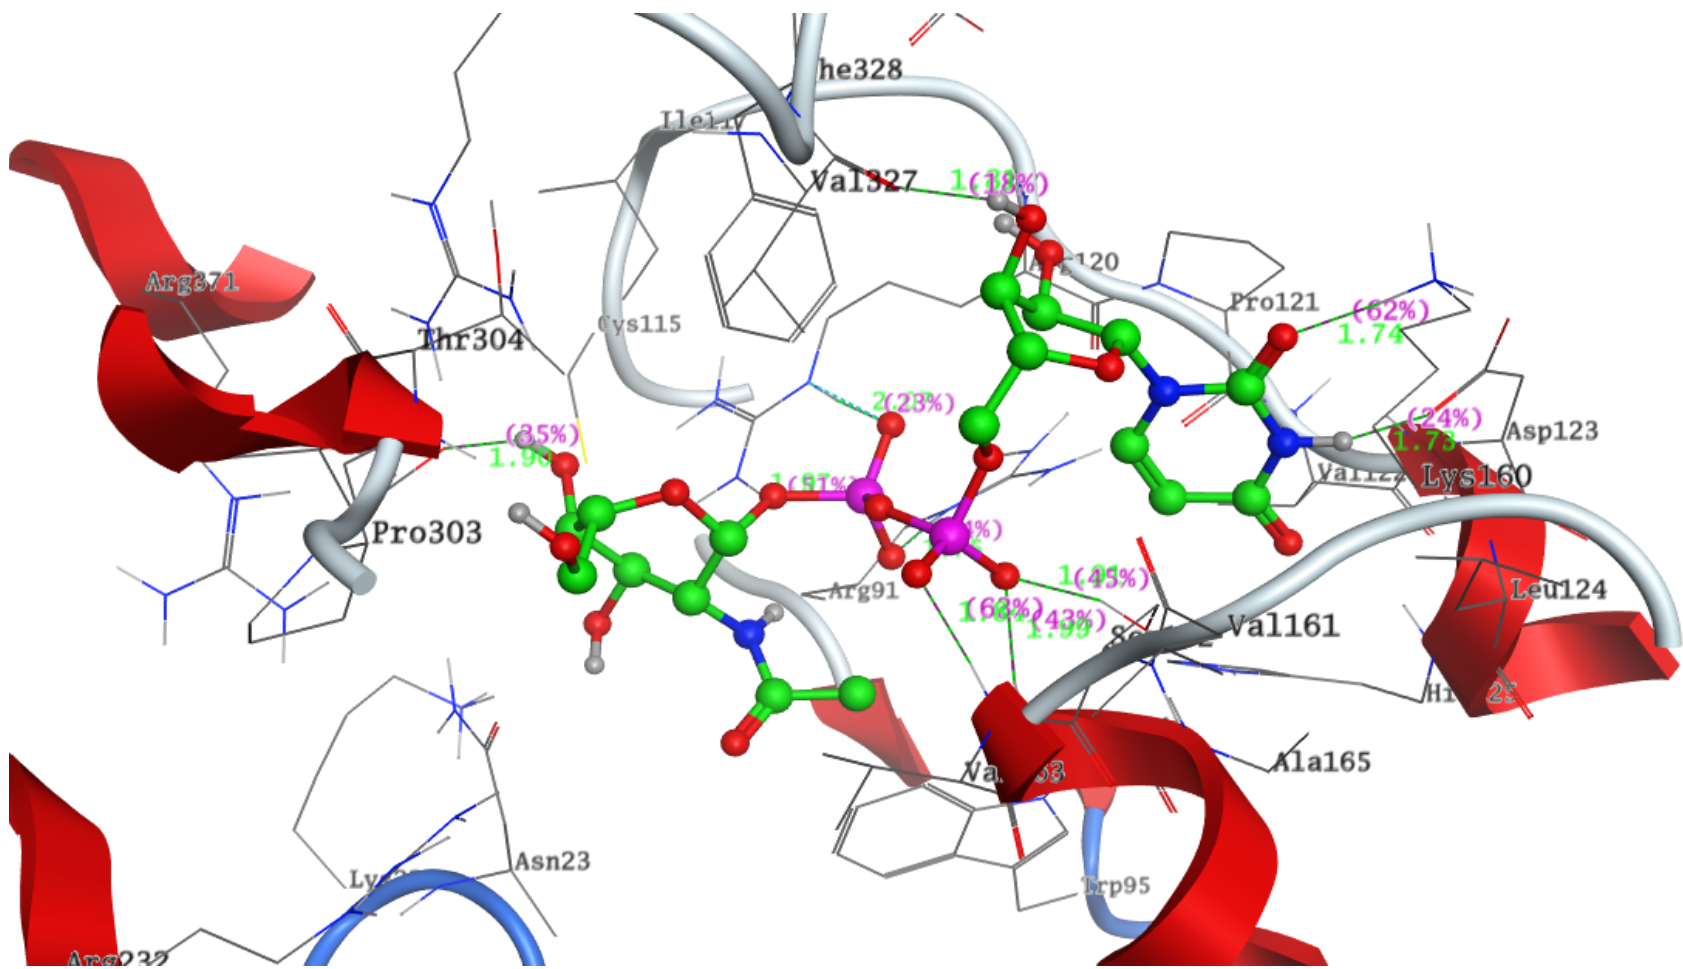

3D structure of **co-crystallized ligand** inside the active site of Mur A (PDB: 1AUE)

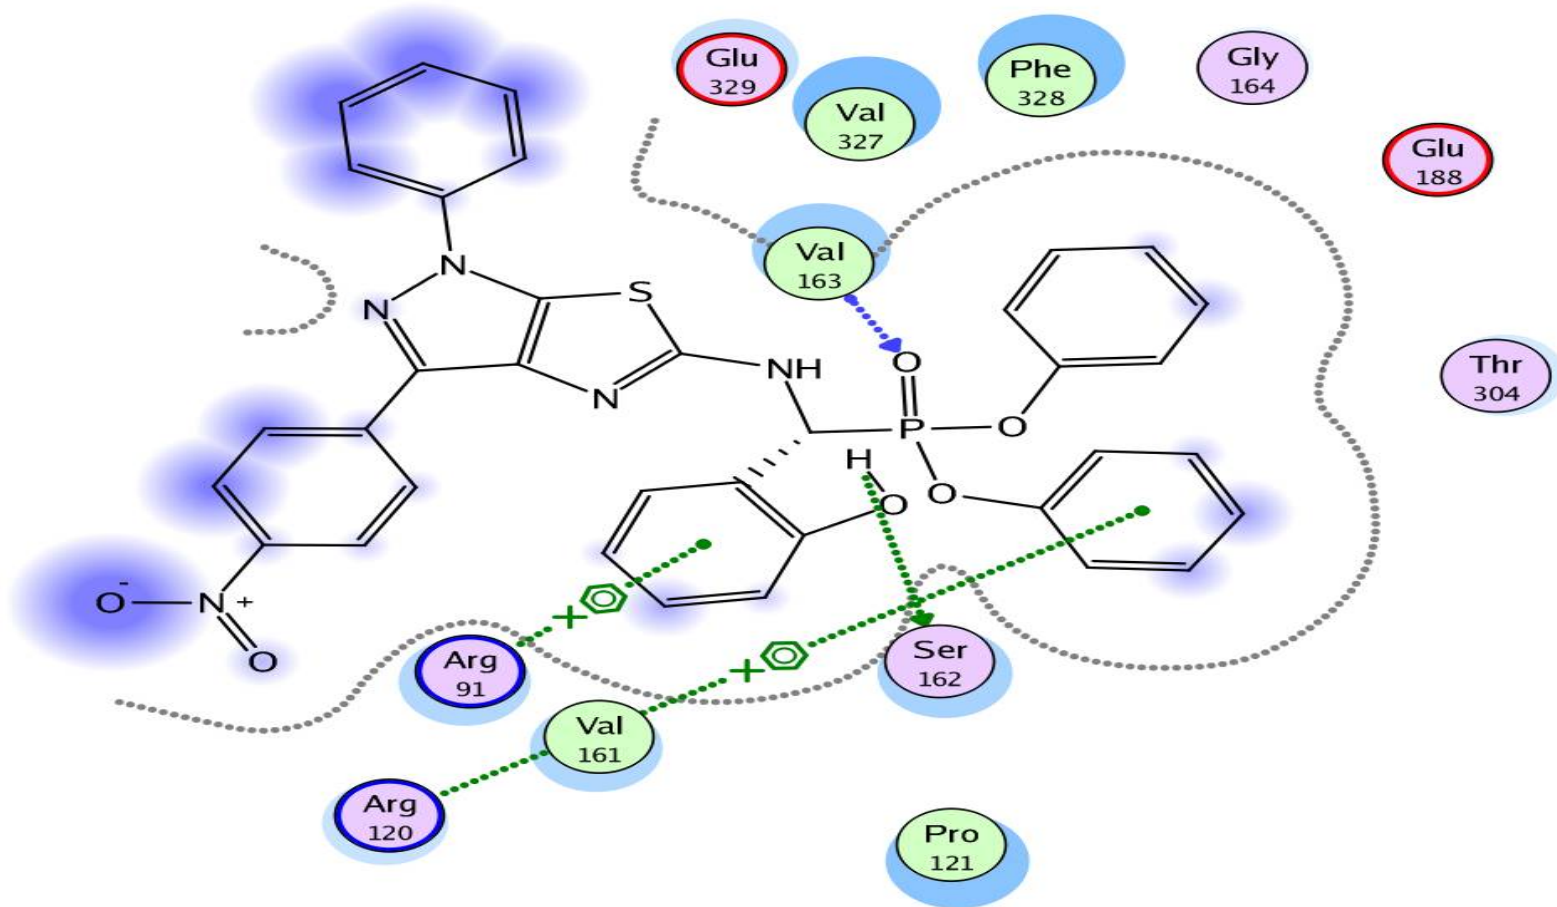

2D structure of most active diphenyl  $\alpha$ -aminophosphonate derivatives **5a** inside the active site of Mur A (PDB: 1AUE)



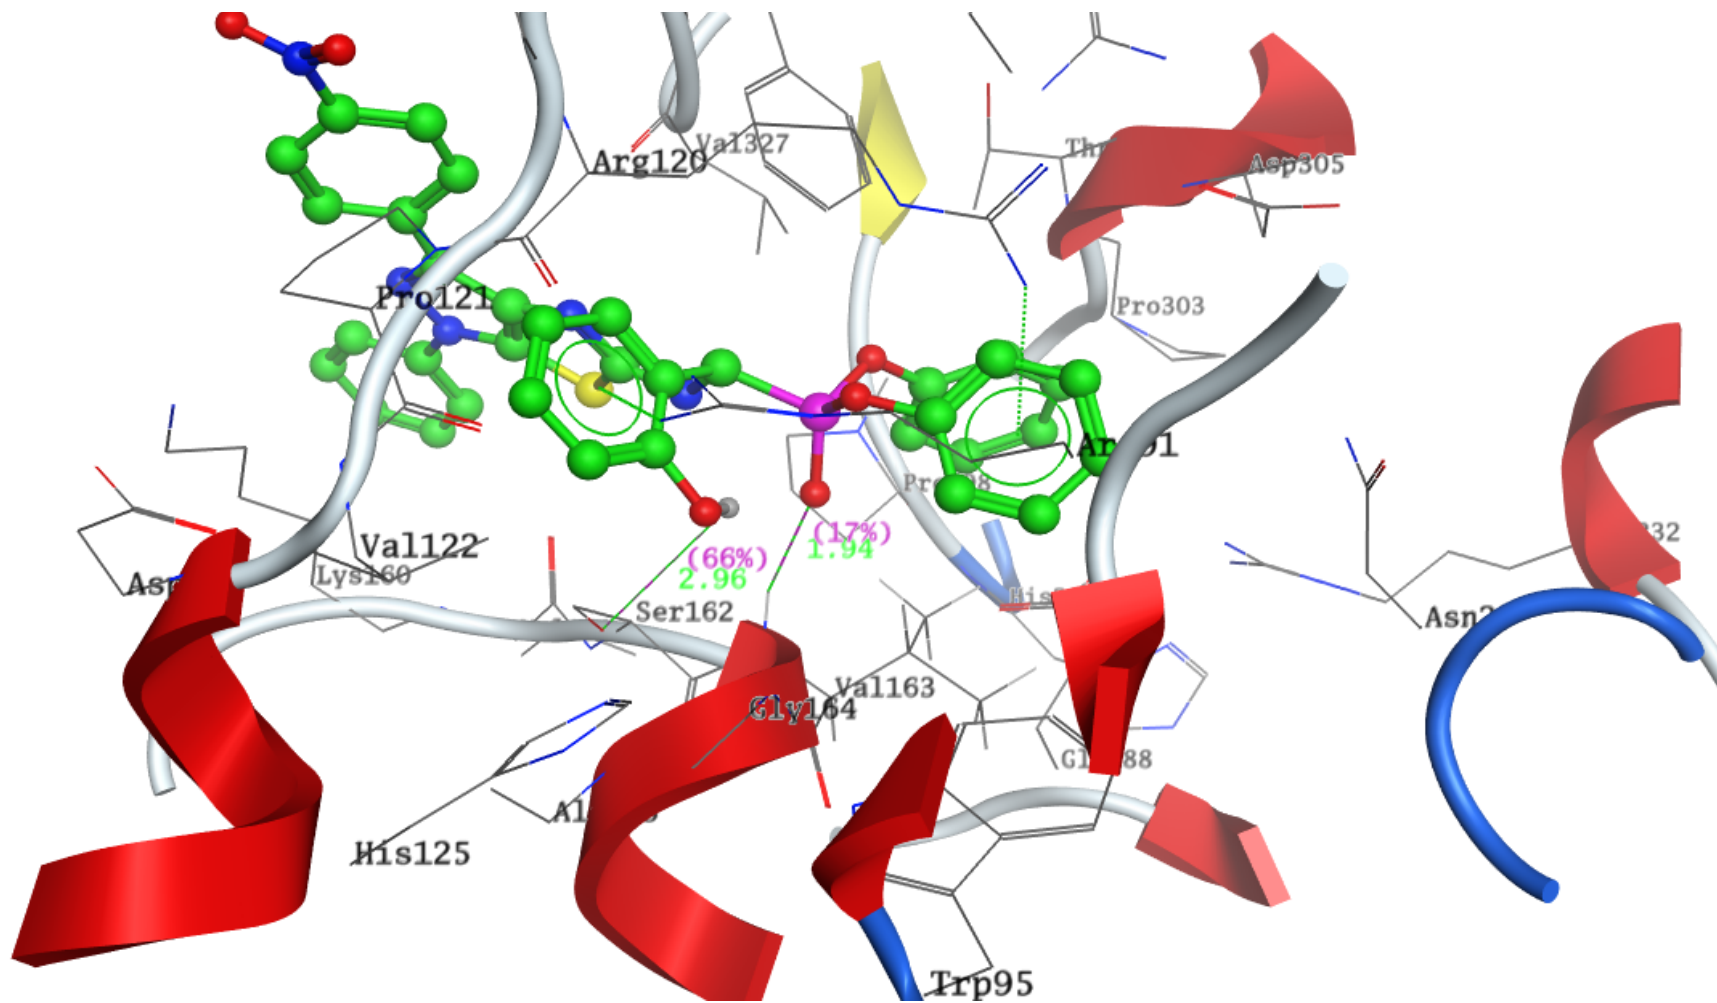

3D structure of most active diphenyl  $\alpha$ -aminophosphonate derivatives **5a** inside the active site of Mur A (PDB: 1AUE)

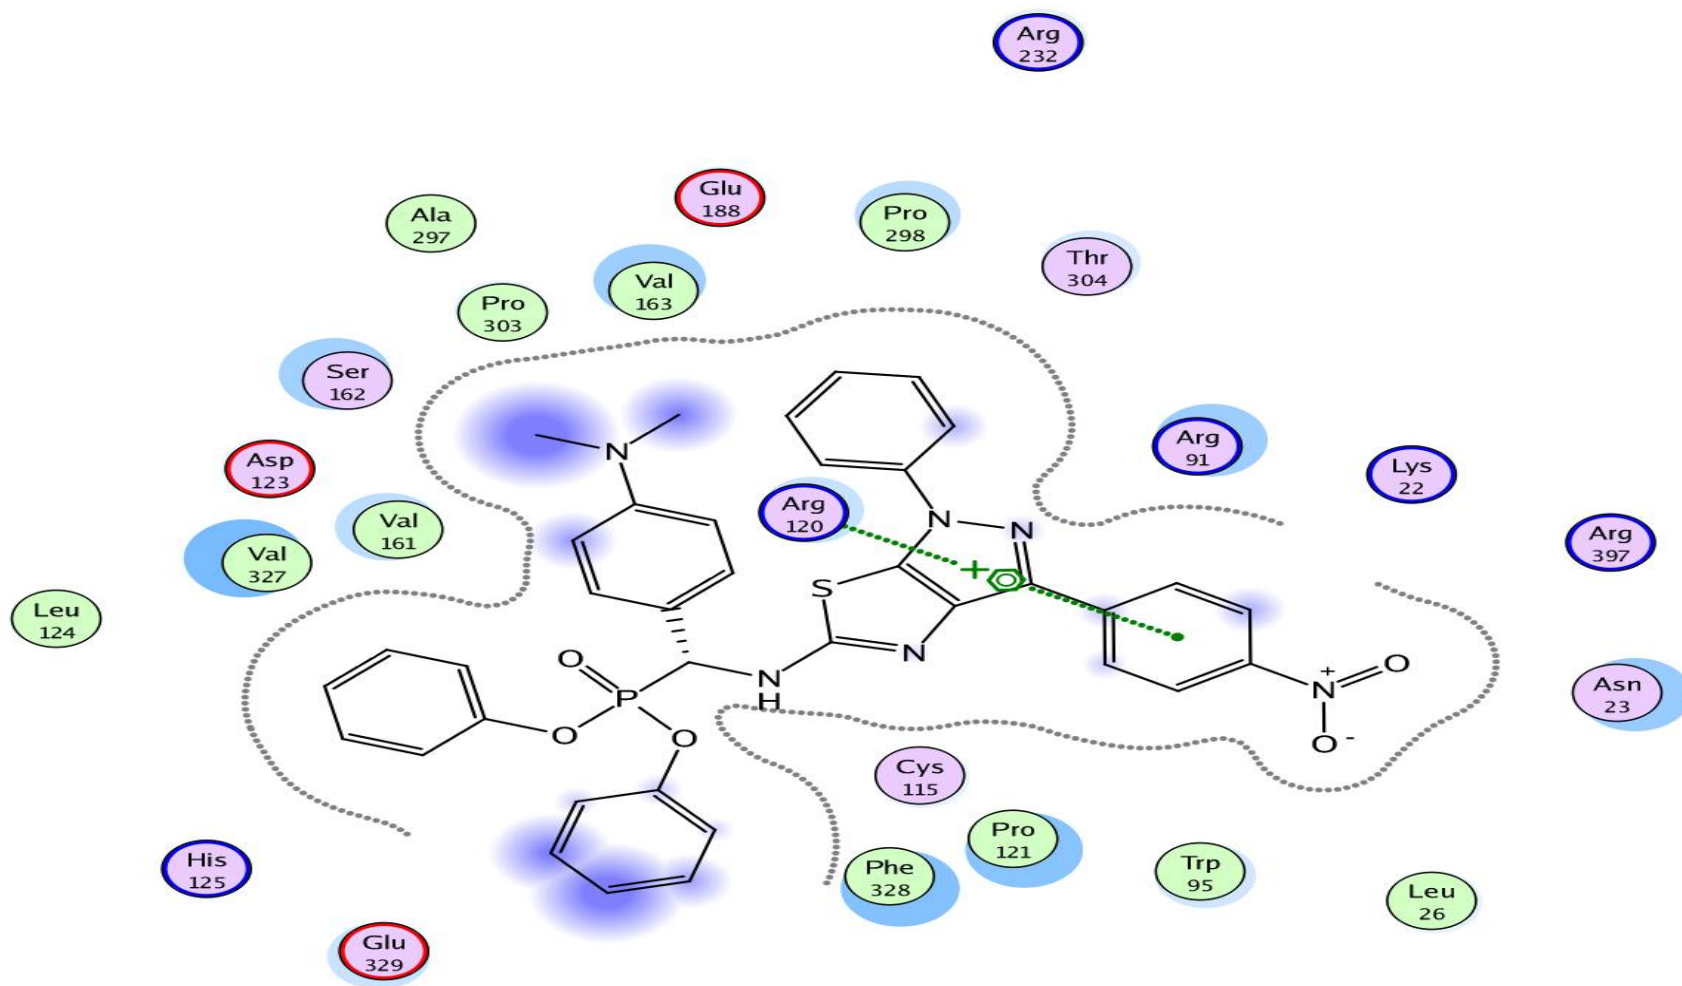

2D structure of most active diphenyl  $\alpha$ -aminophosphonate derivatives **5b** inside the active site of Mur A (PDB: 1AUE)

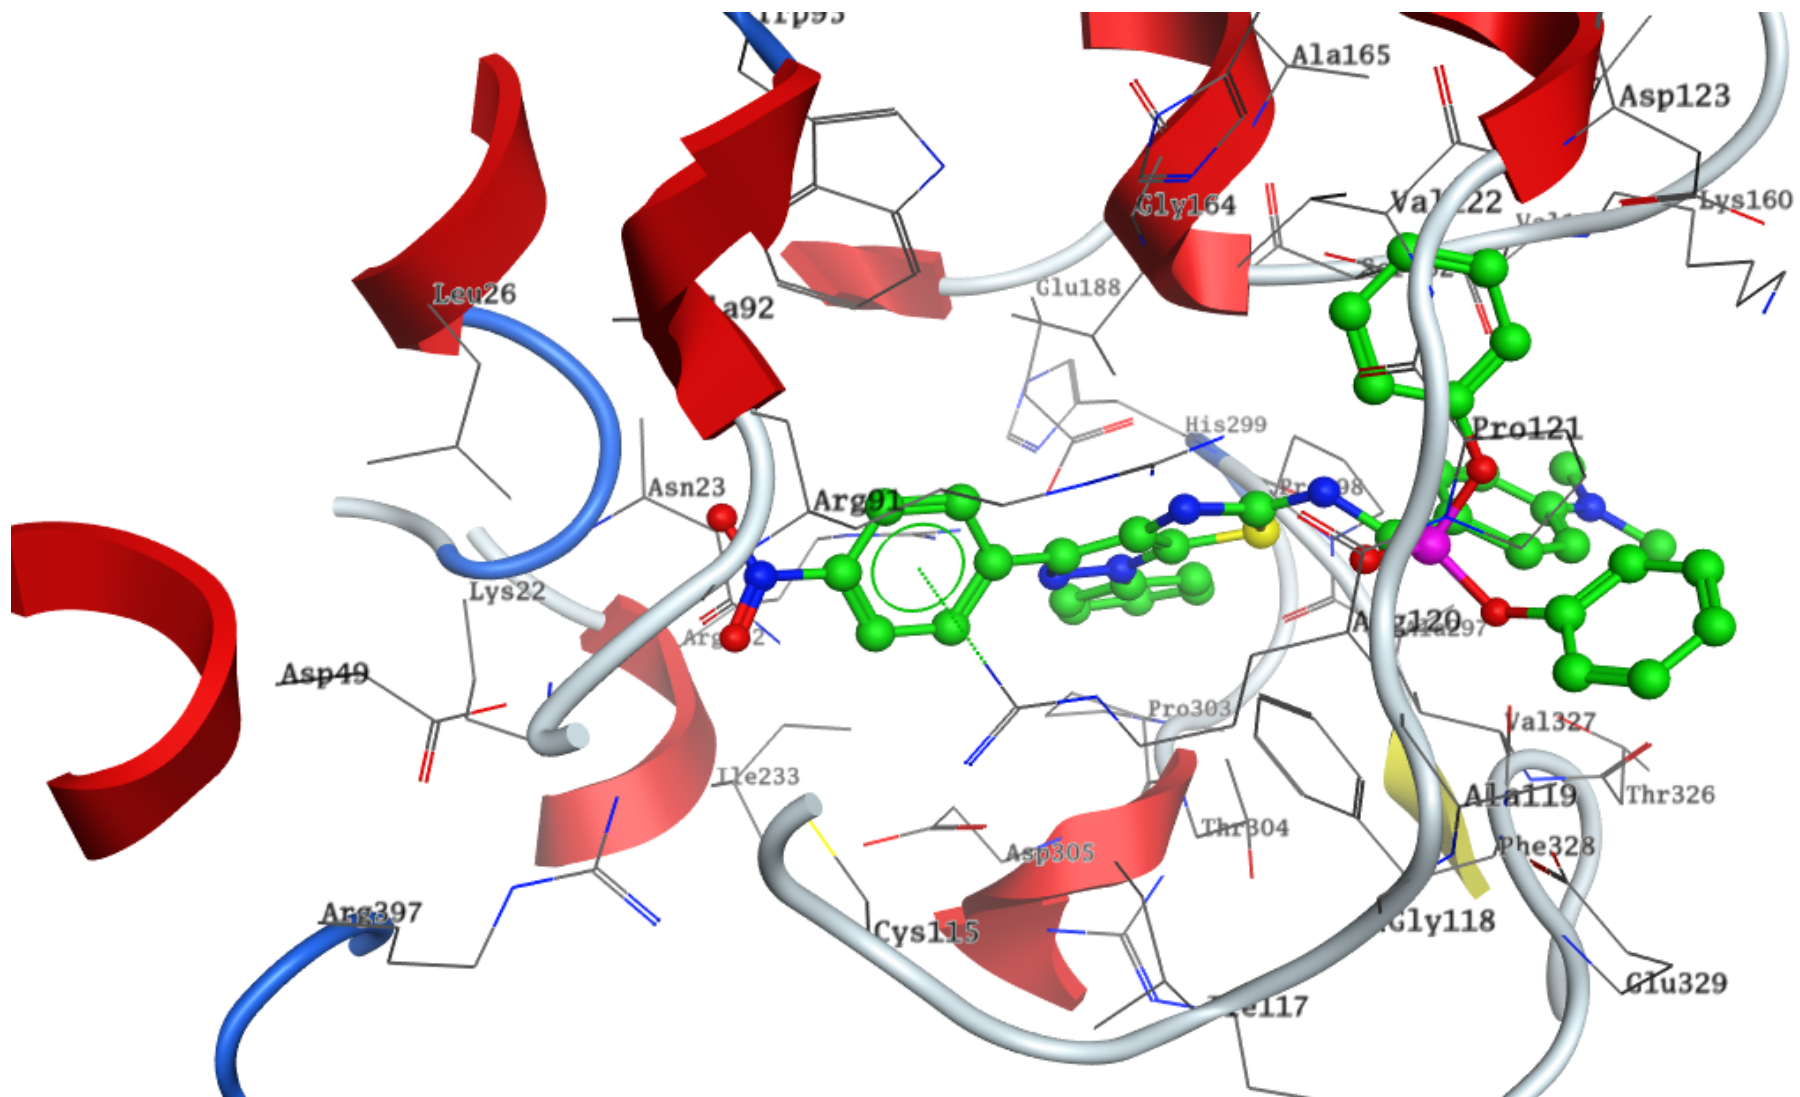

3D structure of most active diphenyl  $\alpha$ -aminophosphonate derivatives **5b** inside the active site of Mur A (PDB: 1AUE)

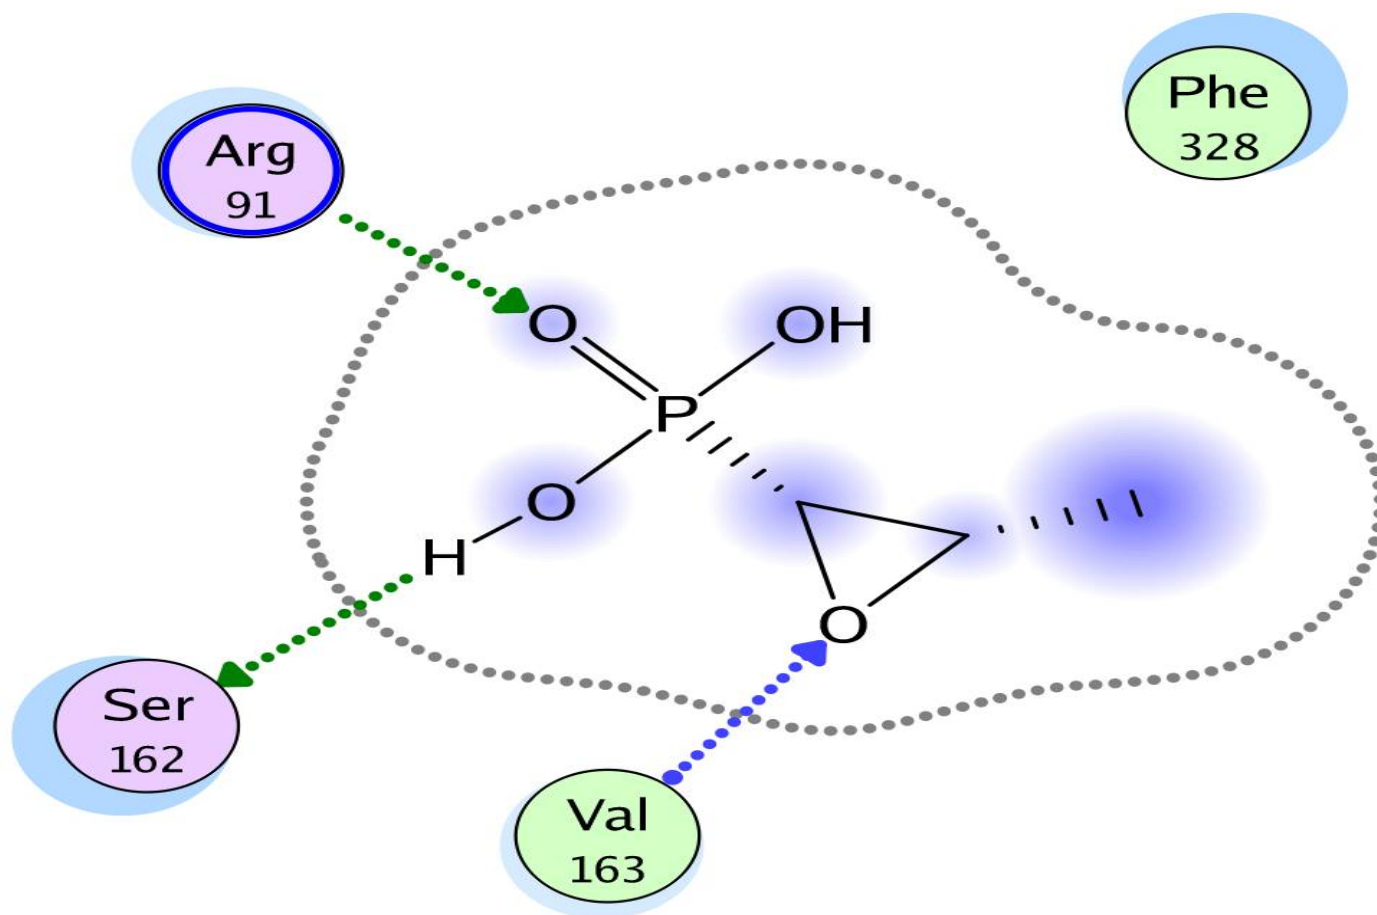

2D structure of most active diphenyl  $\alpha$ -aminophosphonate derivatives **Fosfomicin** inside the active site of Mur A (PDB: 1AUE)

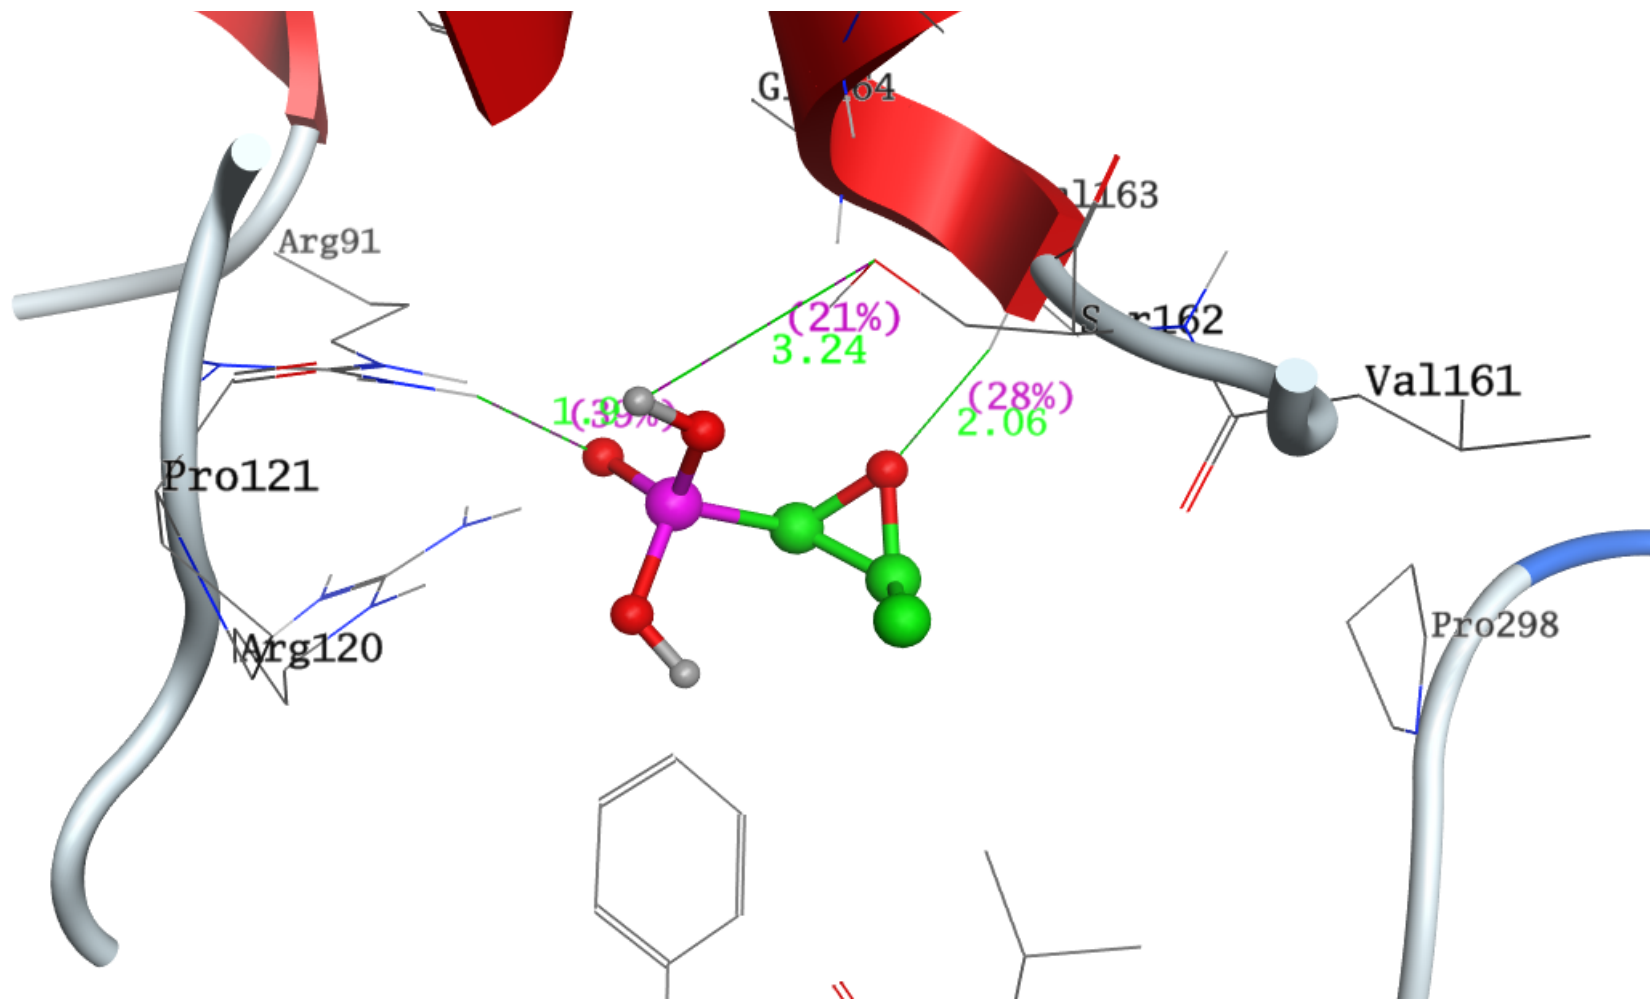

3D structure of most active diphenyl  $\alpha$ -aminophosphonate derivatives **Fosfomicin** inside the active site of Mur A (PDB: 1AUE)

# DFT calculations Figures

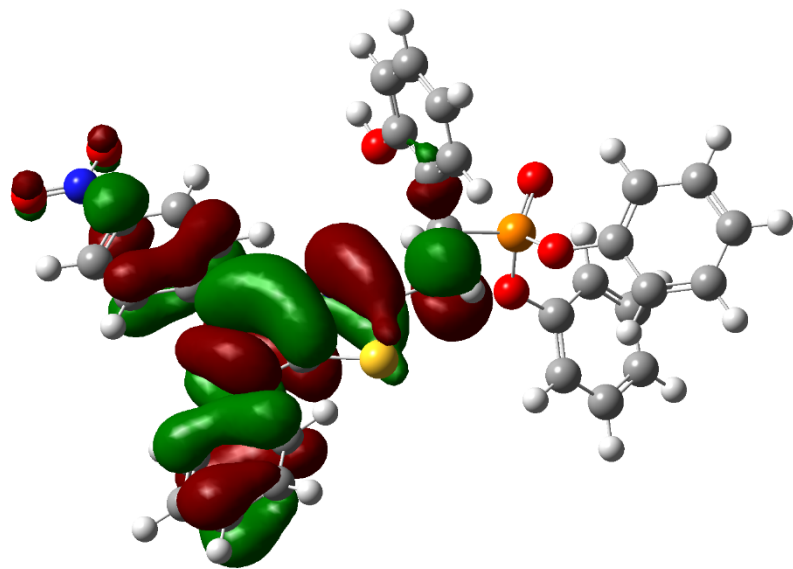

5a HOMO

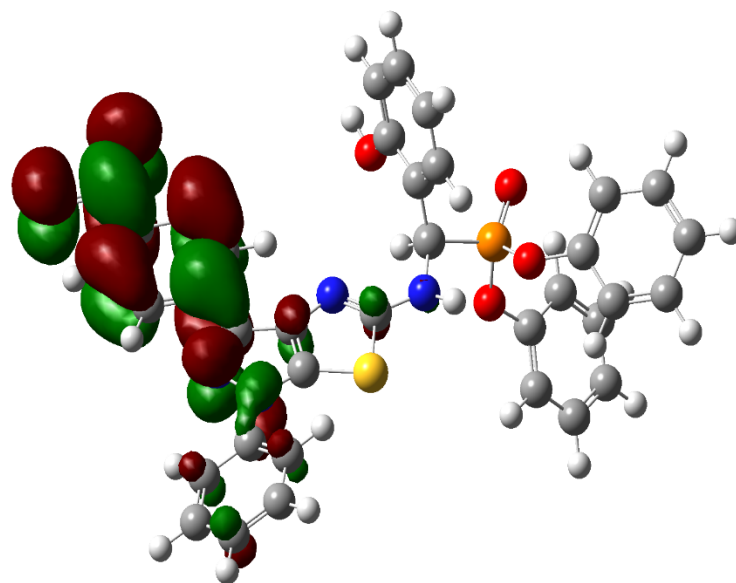

5a LUMO

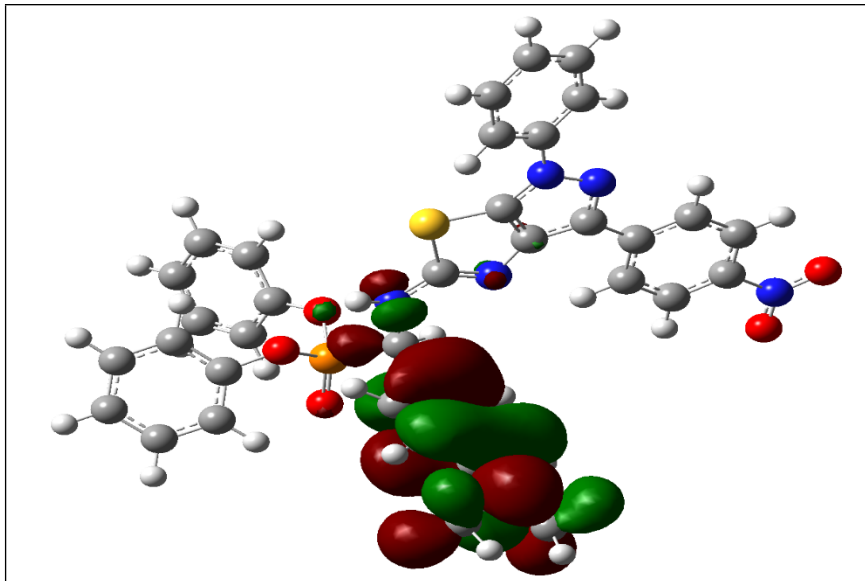

5b HOMO

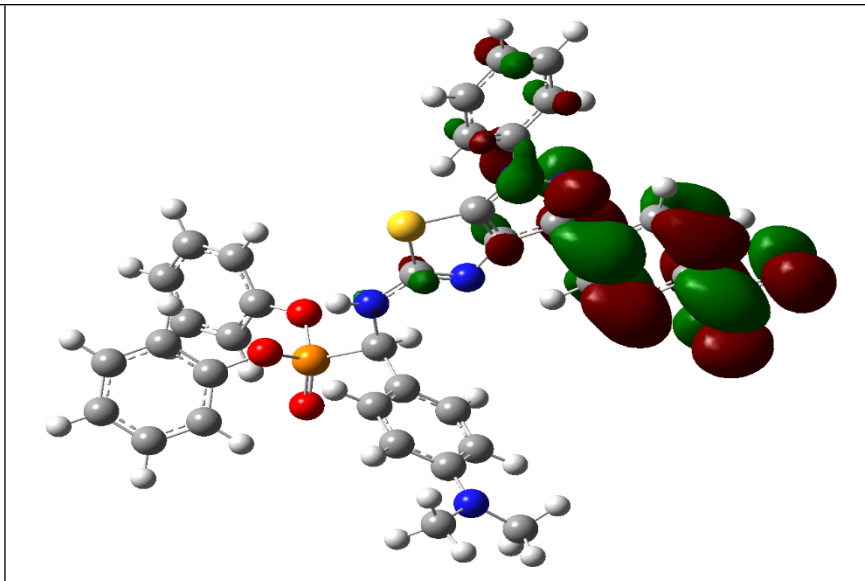

5b LUMO

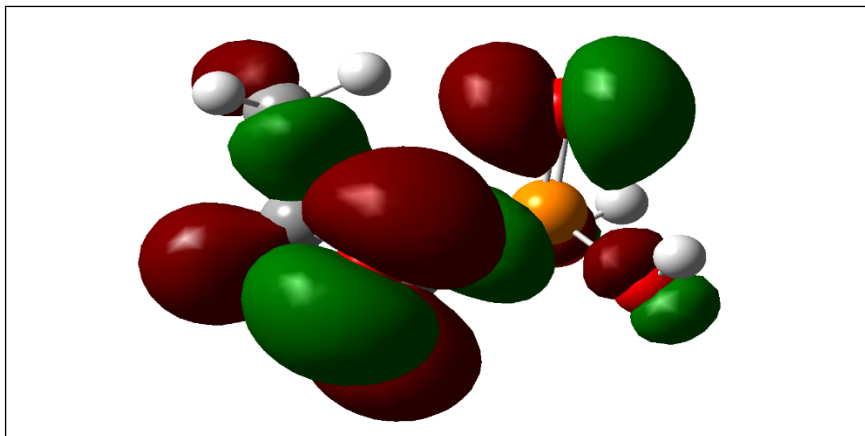

Fosfomicin HOMO

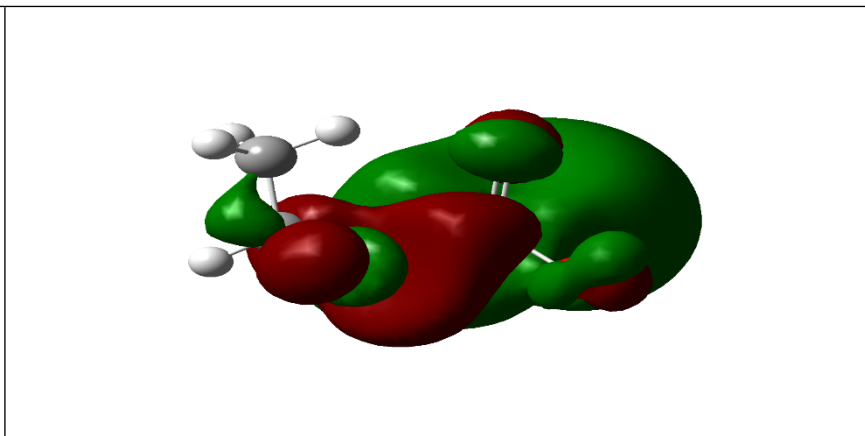

Fosfomicin HUMO



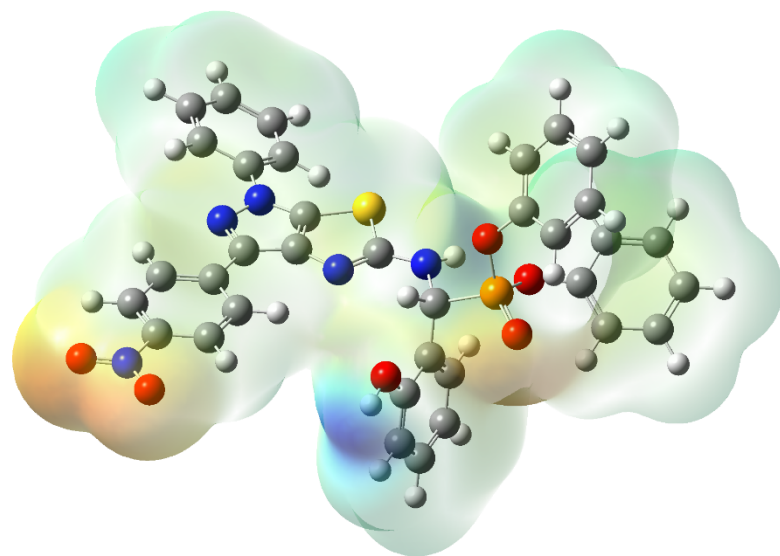

MEP maps 5a

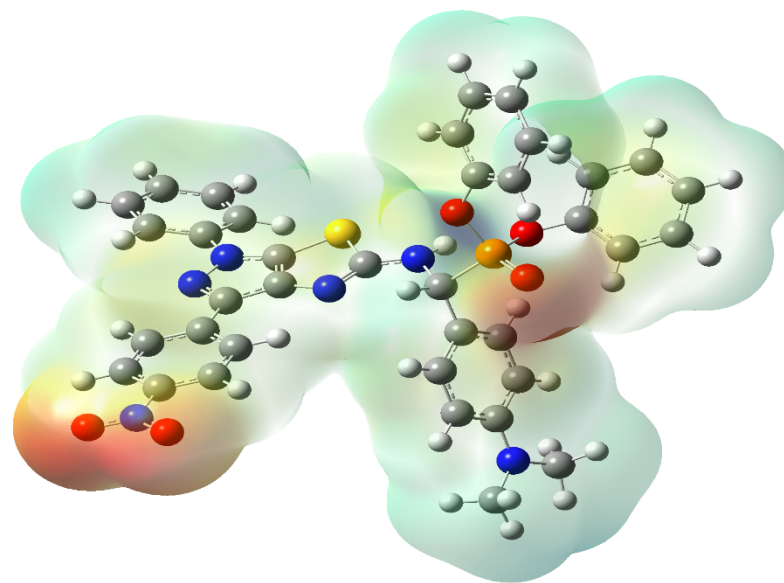

MEP maps 5b

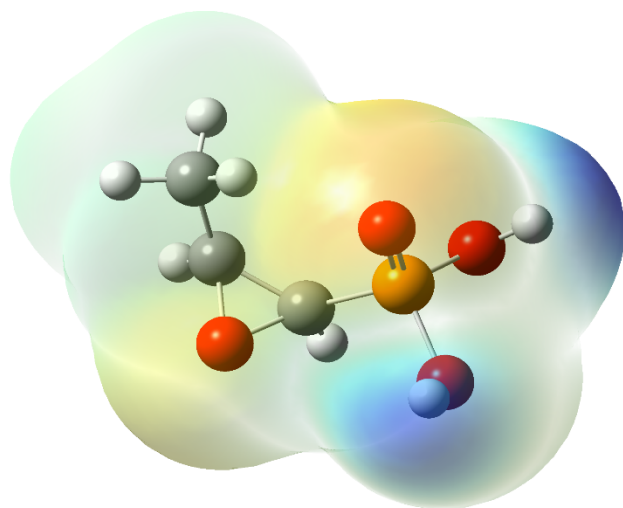

**Fosfomycin MEP maps**
